# Supplementary material for: Inadvertent Paralog Inclusion Drives Artifactual Topologies and Timetree Estimates in Phylogenomics
Source: PubMed Central journal article supplement (PMC6526904; doi:10.1093/molbev/msz067), 2019-03-23
Supplement: supplementary_material_msz067.pdf [file supplementary_material_msz067.pdf]

**Supplementary Table S1.** Details of all transcriptomic, genomic and EST sequences per species included in this study. In the assembled transcriptomes, number of contigs and N50 (in parentheses) is specified for both downloaded and *de novo* sequencing. For genomic data number of CDS downloaded is specified. Last column contains the source of the data. Species denoted with “\*” were each represented by transcriptomes from two individuals (see Methods).

| Class, Order and Family | Species names                      | Common name    | Transcriptome Assembly: No. Contigs (N50) | ESTs   | Genomic (# CDS)                         | # of CDS included after filtering for longest | Sources                                                                                                                                                                  |
|-------------------------|------------------------------------|----------------|-------------------------------------------|--------|-----------------------------------------|-----------------------------------------------|--------------------------------------------------------------------------------------------------------------------------------------------------------------------------|
| <b>Amphibia</b>         |                                    |                |                                           |        |                                         |                                               |                                                                                                                                                                          |
| <b>Anura</b>            |                                    |                |                                           |        |                                         |                                               |                                                                                                                                                                          |
| Aromobatidae            | <i>Allobates femoralis</i>         | -              | 251,124 contigs (847)                     | -      | -                                       | 50756                                         | This study, GenBank: PRJNA430346                                                                                                                                         |
| Bufo                    | <i>Amazophrynella minuta</i>       | -              | 155,527 contigs (898)                     | -      | -                                       | 36585                                         | This study, GenBank: PRJNA430346                                                                                                                                         |
| Craugastoridae          | <i>Pristimantis toftae</i>         | -              | 98,804 contigs (709)                      | -      | -                                       | 25318                                         | This study, GenBank: PRJNA430346                                                                                                                                         |
| Dendrobatidae           | <i>Ameerega petersi</i>            | -              | 85,877 contigs (574)                      | -      | -                                       | 19811                                         | This study, GenBank: PRJNA430346                                                                                                                                         |
| Dendrobatidae           | <i>Ranitomeya sirensis</i>         | -              | 368,483 contigs (754)                     | -      | -                                       | 82092                                         | This study, GenBank: PRJNA430346                                                                                                                                         |
| Dicroglossidae          | <i>Nanorana parkeri</i>            | -              | -                                         | -      | Genomic 22,972 protein coding sequences | 23410                                         | Predicted CDS downloaded from <a href="http://gigaadb.org/dataset/100132">http://gigaadb.org/dataset/100132</a>                                                          |
| Hylidae                 | <i>Scinax ruber</i>                | -              | 182,237 contigs (832)                     | -      | -                                       | 42569                                         | This study, GenBank: PRJNA430346                                                                                                                                         |
| Pipidae                 | <i>Xenopus tropicalis</i>          | -              | -                                         | -      | Genomic 22,718 protein coding sequences | 18429                                         | Ensembl v84 / JGI 4.2                                                                                                                                                    |
| <b>Caudata</b>          |                                    |                |                                           |        |                                         |                                               |                                                                                                                                                                          |
| Ambystomatidae          | <i>Ambystoma mexicanum</i>         | -              | 173,592 contigs (902)                     | 26,101 | -                                       | 63475                                         | SRR650441 - SRR650443; ESTs from NCBI with a Taxonomy search                                                                                                             |
| Ambystomatidae          | <i>Ambystoma tigrinum</i>          | -              | 57,748 contigs (445)                      | 20,495 | -                                       | 21230                                         | <a href="http://dx.doi.org/10.5061/dryad.49s43">http://dx.doi.org/10.5061/dryad.49s43</a> ; EST ID: LIBEST_015526                                                        |
| Hynobiidae              | <i>Hynobius chinensis</i>          | -              | 146,142 contigs (804)                     | -      | -                                       | 41938                                         | SRR1042328                                                                                                                                                               |
| Salamandridae           | <i>Cynops pyrrhogaster</i>         | -              | 451,790 contigs (1509)                    | -      | -                                       | 121567                                        | SRR1051839                                                                                                                                                               |
| Salamandridae           | <i>Notophthalmus viridescens</i>   | -              | 56,401 contigs (1306)                     | -      | -                                       | 34899                                         | Assembly downloaded from <a href="http://newt-omics.mpi-bn.mpg.de/De_Novo_Transcriptome_Newt.fasta">http://newt-omics.mpi-bn.mpg.de/De_Novo_Transcriptome_Newt.fasta</a> |
| <b>Gymnophiona</b>      |                                    |                |                                           |        |                                         |                                               |                                                                                                                                                                          |
| Caeciliidae             | <i>Caecilia tentaculata</i>        | -              | 287,446 contigs (1628)                    | -      | -                                       | 72328                                         | GenBank: PRJNA387587                                                                                                                                                     |
| Rhinatreumatidae        | <i>Rhinatrema bivittatum</i> *     | -              | 284,451 (1561); 276,470 (1519)            | -      | -                                       | 68390 and 73577                               | GenBank: PRJNA387587                                                                                                                                                     |
| Siphonopidae            | <i>Microcaecilia unicolor</i> *    | -              | 166,567 (1569); 232,851 (1450)            | -      | -                                       | 45933 and 54630                               | GenBank: PRJNA387587                                                                                                                                                     |
| Siphonopidae            | <i>Microcaecilia dermatophaga</i>  | -              | 199,546 contigs (1574)                    | -      | -                                       | 47965                                         | GenBank: PRJNA387587                                                                                                                                                     |
| Typhlonectidae          | <i>Typhlonectes compressicauda</i> | -              | 265,047 contigs (1454)                    | -      | -                                       | 67739                                         | GenBank: PRJNA387587                                                                                                                                                     |
| <b>Agnatha</b>          |                                    |                |                                           |        |                                         |                                               |                                                                                                                                                                          |
|                         | <i>Petromyzon marinus</i>          | Lamprey        | -                                         | -      | Genomic 11442 protein coding sequences  | 10,402                                        | Ensembl v84 / Pmarinus_7.0                                                                                                                                               |
| <b>Gnathostomes</b>     |                                    |                |                                           |        |                                         |                                               |                                                                                                                                                                          |
|                         | <i>Callorhynchus milii</i>         | Elephant shark | -                                         | -      | Genomic 28158 protein coding sequences  | 31066                                         | Predicted cDNA from <a href="http://esharkgenome.imcb.a-star.edu.sg/download/">http://esharkgenome.imcb.a-star.edu.sg/download/</a>                                      |
|                         | <i>Danio rerio</i>                 | Zebrafish      | -                                         | -      | Genomic 50142 protein coding sequences  | 25571                                         | Ensembl v84 / GRCz10                                                                                                                                                     |
|                         | <i>Takifugu rubripes</i>           | Pufferfish     | -                                         | -      | Genomic 47841 protein coding sequences  | 18510                                         | Ensembl v84 / FUGU 4.0                                                                                                                                                   |
|                         | <i>Protopterus annectens</i>       | Lungfish       | 154,496 contigs (1616)                    | -      | -                                       | 40822                                         | SRR505721-SRR505726, SRR088619-SRR088625                                                                                                                                 |
|                         | <i>Latimeria chalumnae</i>         | Coelacanth     | -                                         | -      | Genomic 23601 protein coding sequences  | 19556                                         | Ensembl v84 / LatCha1                                                                                                                                                    |
| <b>Reptilia</b>         |                                    |                |                                           |        |                                         |                                               |                                                                                                                                                                          |
|                         | <i>Ophiophagus hannah</i>          | Cobra          | -                                         | -      | Genomic 18,467 protein coding sequences | 18467                                         | GenBank: AZIM01155477.1                                                                                                                                                  |
|                         | <i>Anolis carolinensis</i>         | Anolis         | -                                         | -      | Genomic 19177 protein coding sequences  | 18585                                         | Ensembl v84 / AnoCar2.0                                                                                                                                                  |
|                         | <i>Pelodiscus sinensis</i>         | Turtle         | -                                         | -      | Genomic 20669 protein coding sequences  | 18177                                         | Ensembl v84 / PelSin_1.0                                                                                                                                                 |
| <b>Aves</b>             |                                    |                |                                           |        |                                         |                                               |                                                                                                                                                                          |
|                         | <i>Gallus gallus</i>               | Chicken        | -                                         | -      | Genomic 16354 protein coding sequences  | 15495                                         | Ensembl v84 / Galgal4                                                                                                                                                    |
|                         | <i>Taeniopygia guttata</i>         | Zebrafinch     | -                                         | -      | Genomic 18204 protein coding sequences  | 17475                                         | Ensembl v84 / taGut3.2.4                                                                                                                                                 |
| <b>Mammalia</b>         |                                    |                |                                           |        |                                         |                                               |                                                                                                                                                                          |
|                         | <i>Ornithorhynchus anatinus</i>    | Platypus       | -                                         | -      | Genomic 23584 protein coding sequences  | 21684                                         | Ensembl v84 / OANA5                                                                                                                                                      |
|                         | <i>Loxodonta africana</i>          | Elephant       | -                                         | -      | Genomic 25635 protein coding sequences  | 20021                                         | Ensembl v84 / Loxafr3.0                                                                                                                                                  |
|                         | <i>Bos taurus</i>                  | Cow            | -                                         | -      | Genomic 22118 protein coding sequences  | 19982                                         | Ensembl v84 / UMD3.1                                                                                                                                                     |
|                         | <i>Homo sapiens</i>                | Human          | -                                         | -      | Genomic 156921 protein coding sequences | 22071                                         | Ensembl v84 / GRCh38.p5                                                                                                                                                  |

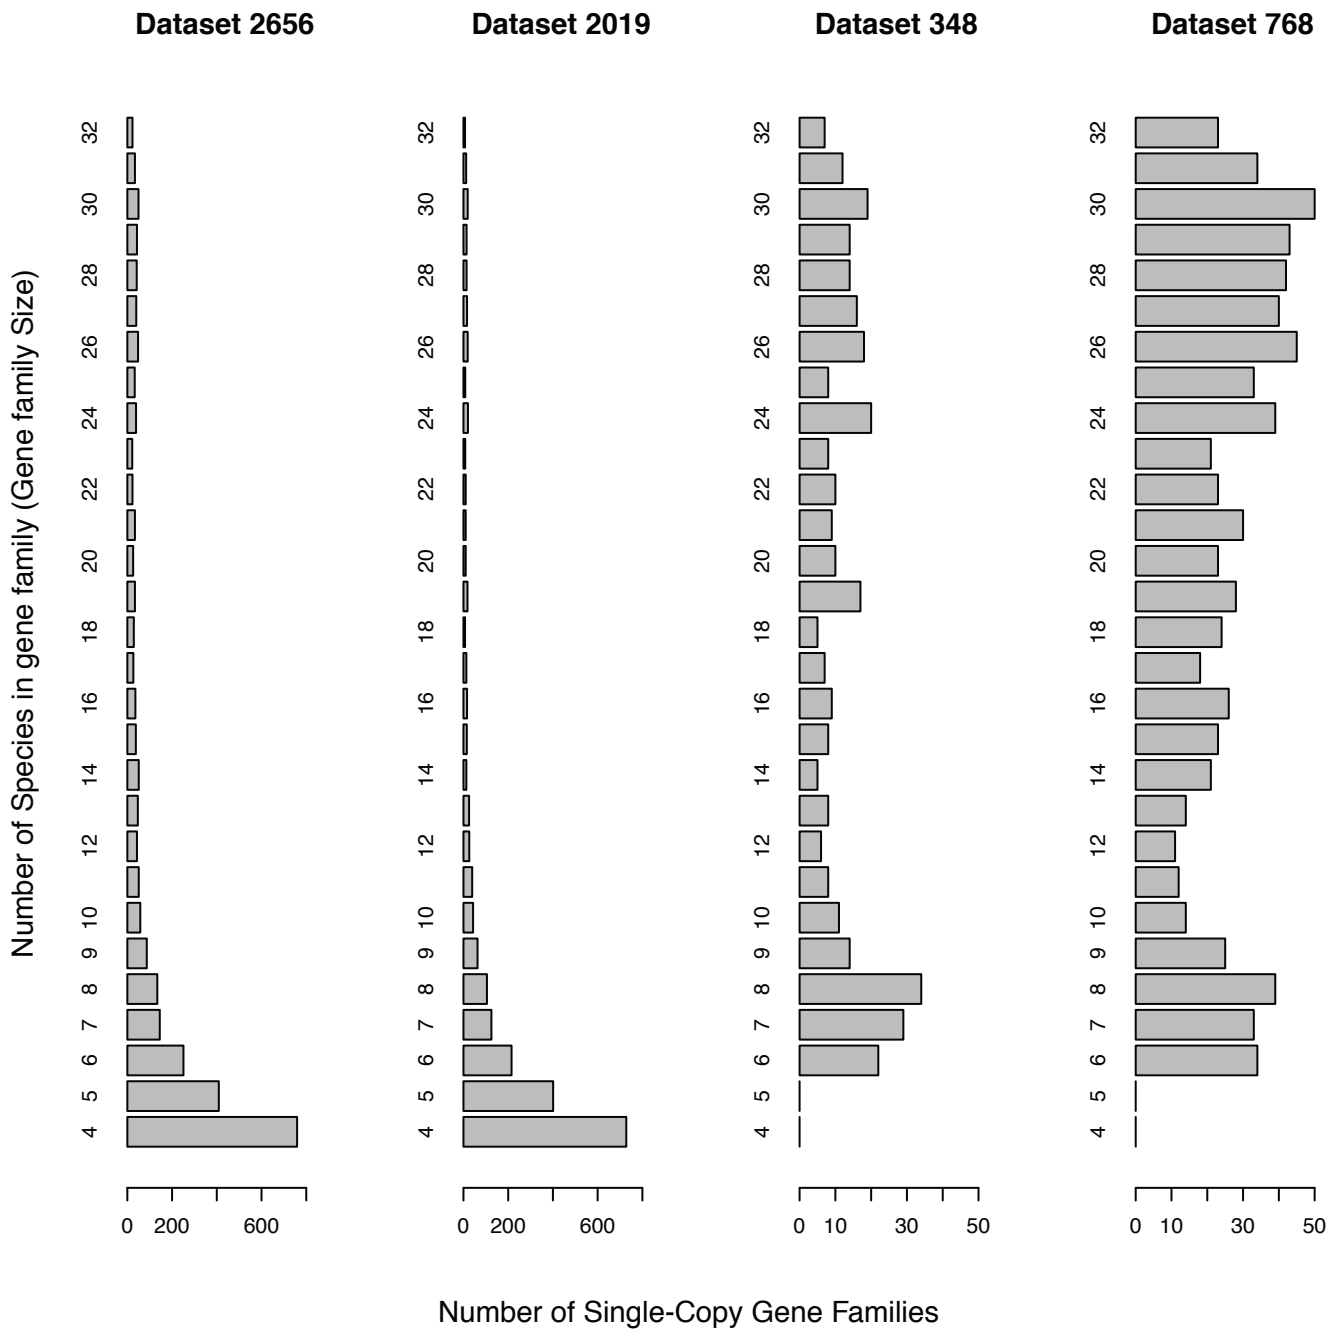

**Supplementary Fig. S1.** The size (number of species per gene family), distribution and number of gene families for each of the 4 datasets examined in this study.

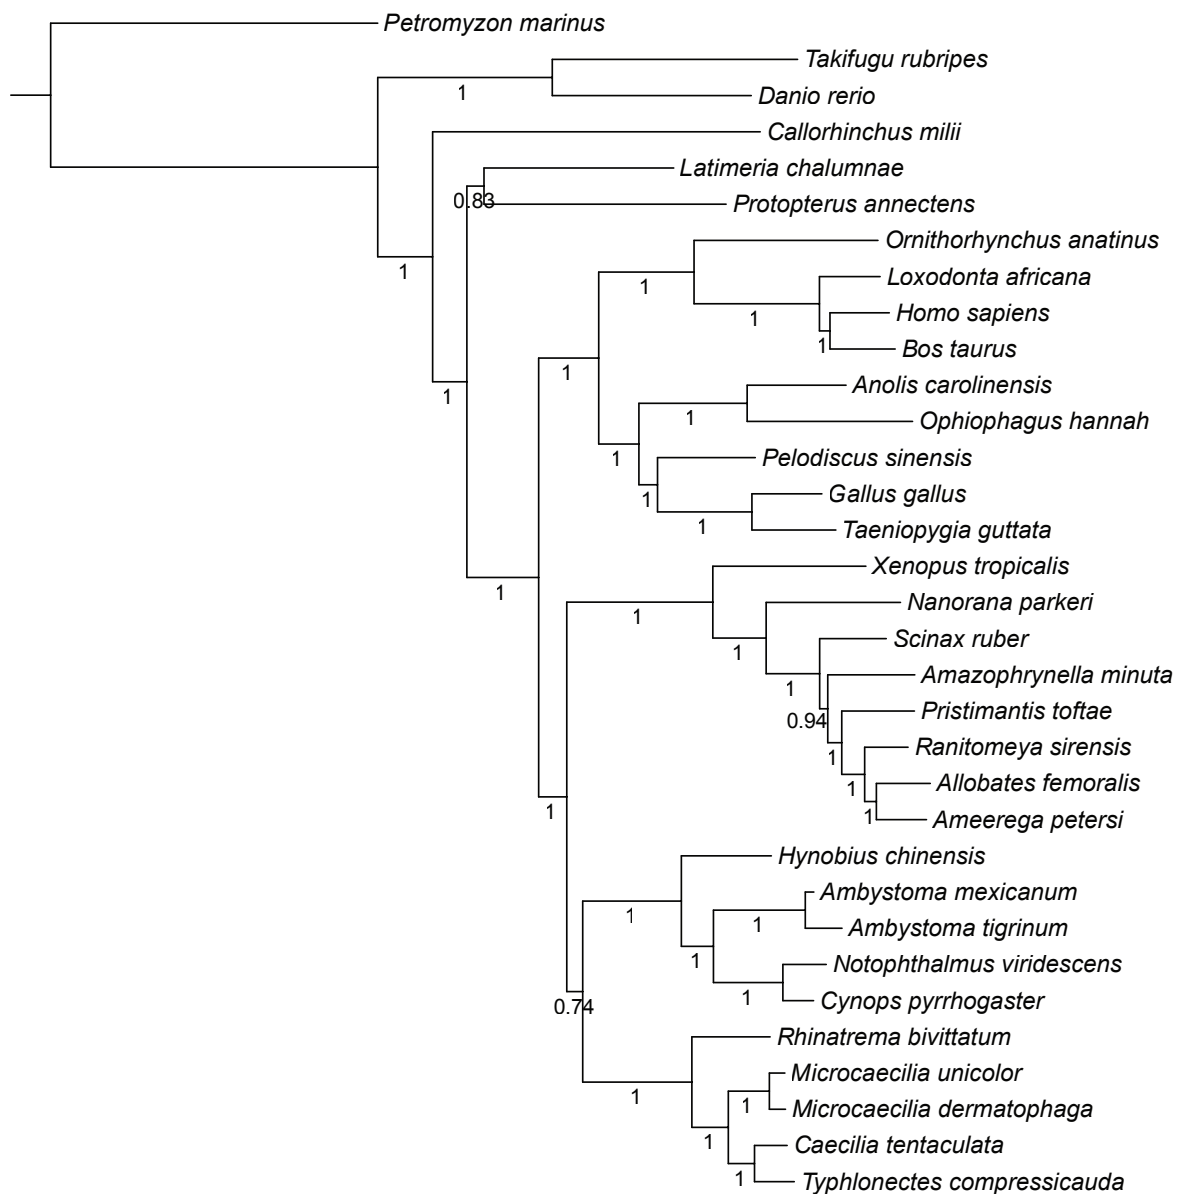

**Supplementary Fig. S2.** Resulting tree inferred with a concatenated alignment of Dataset 2656 using the Maximum Likelihood method in RAxML specifying individual models for each gene partition. Bootstrap support values provided under each node converted to a scale from 0-1, maximum support = 1. See methods for further details.

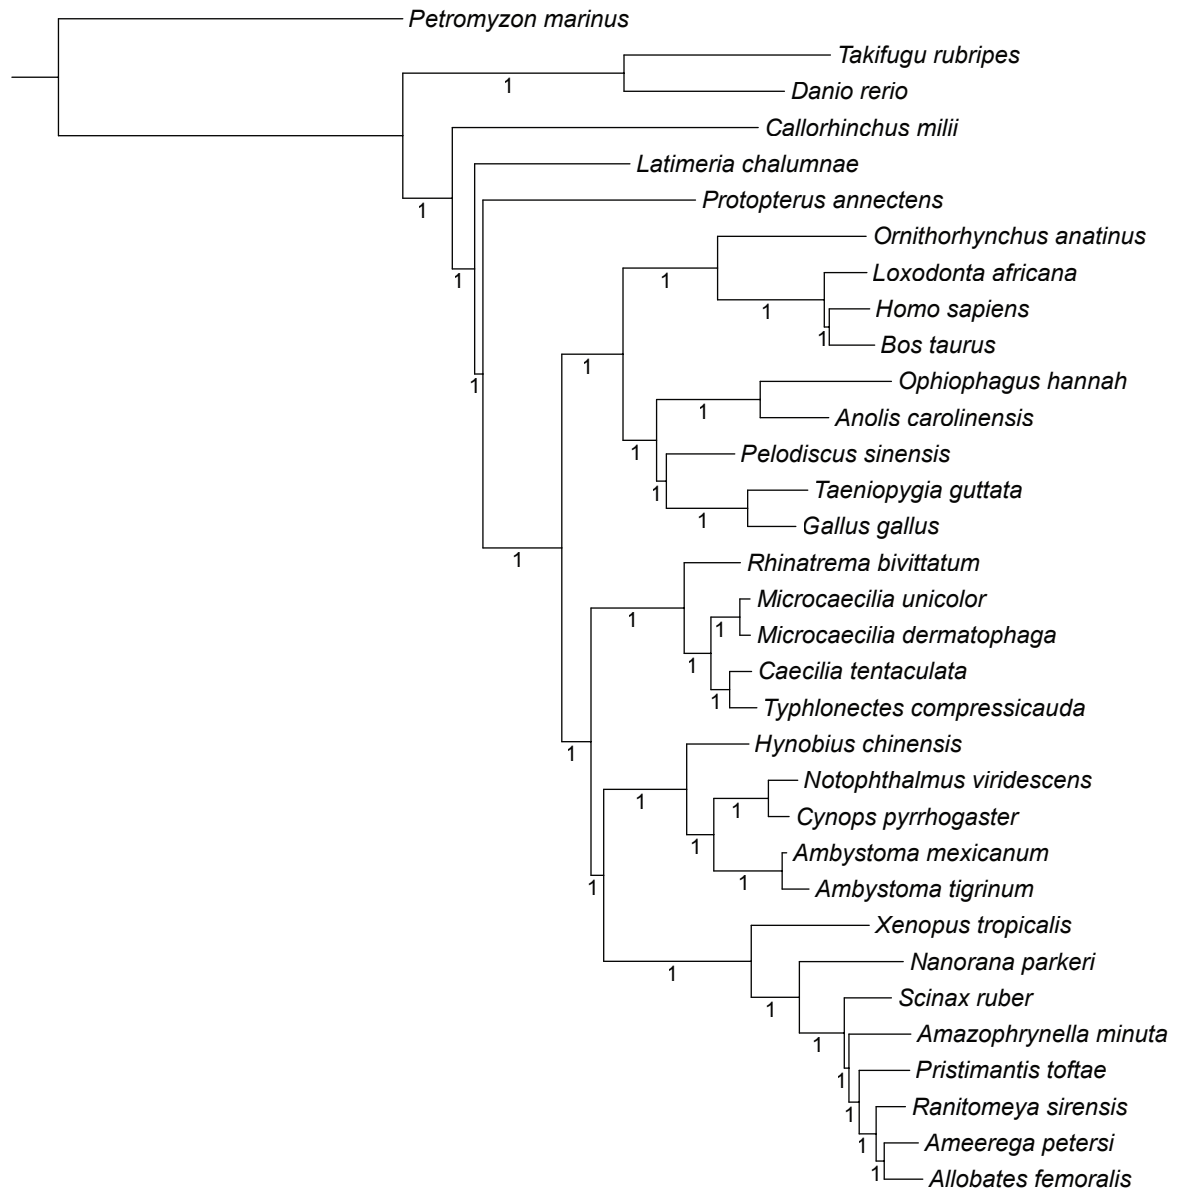

**Supplementary Fig. S3.** Resulting tree inferred with a concatenated alignment of Dataset 2656 using the Bayesian inference method in Phylobayes-MPI with the CAT-GTR model. Posterior probability support values are provided under each node, maximum support = 1. See methods for further details.

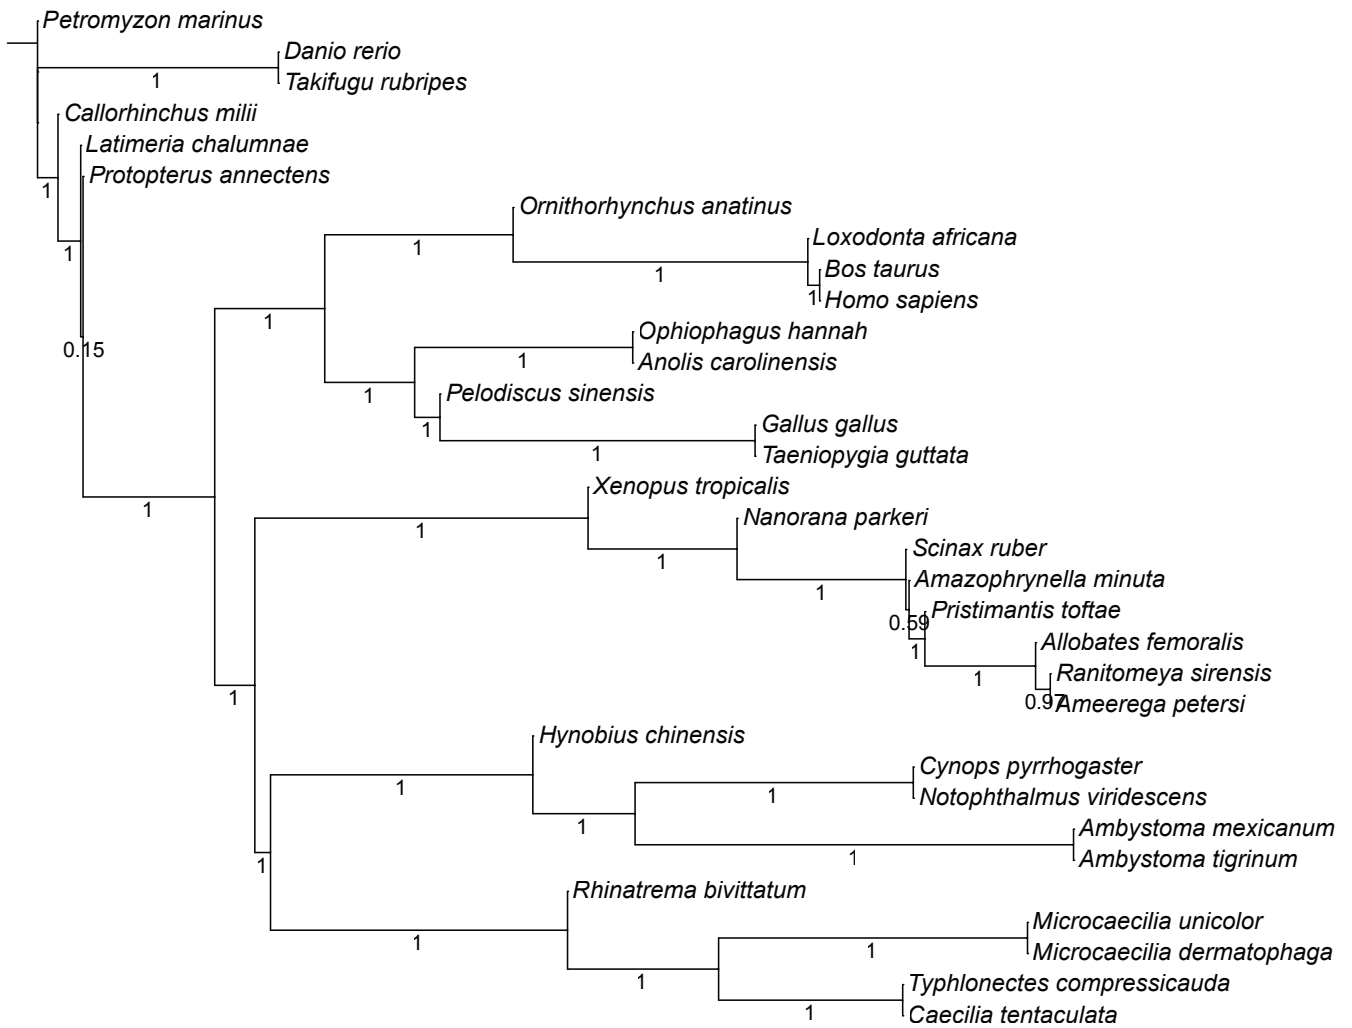

**Supplementary Fig. S4.** Resulting tree inferred with input gene trees from Dataset 2656 using the Quartet based supertree method ASTRAL-II. Local posterior probability support values are provided under each node, maximum support = 1. See methods for further details.

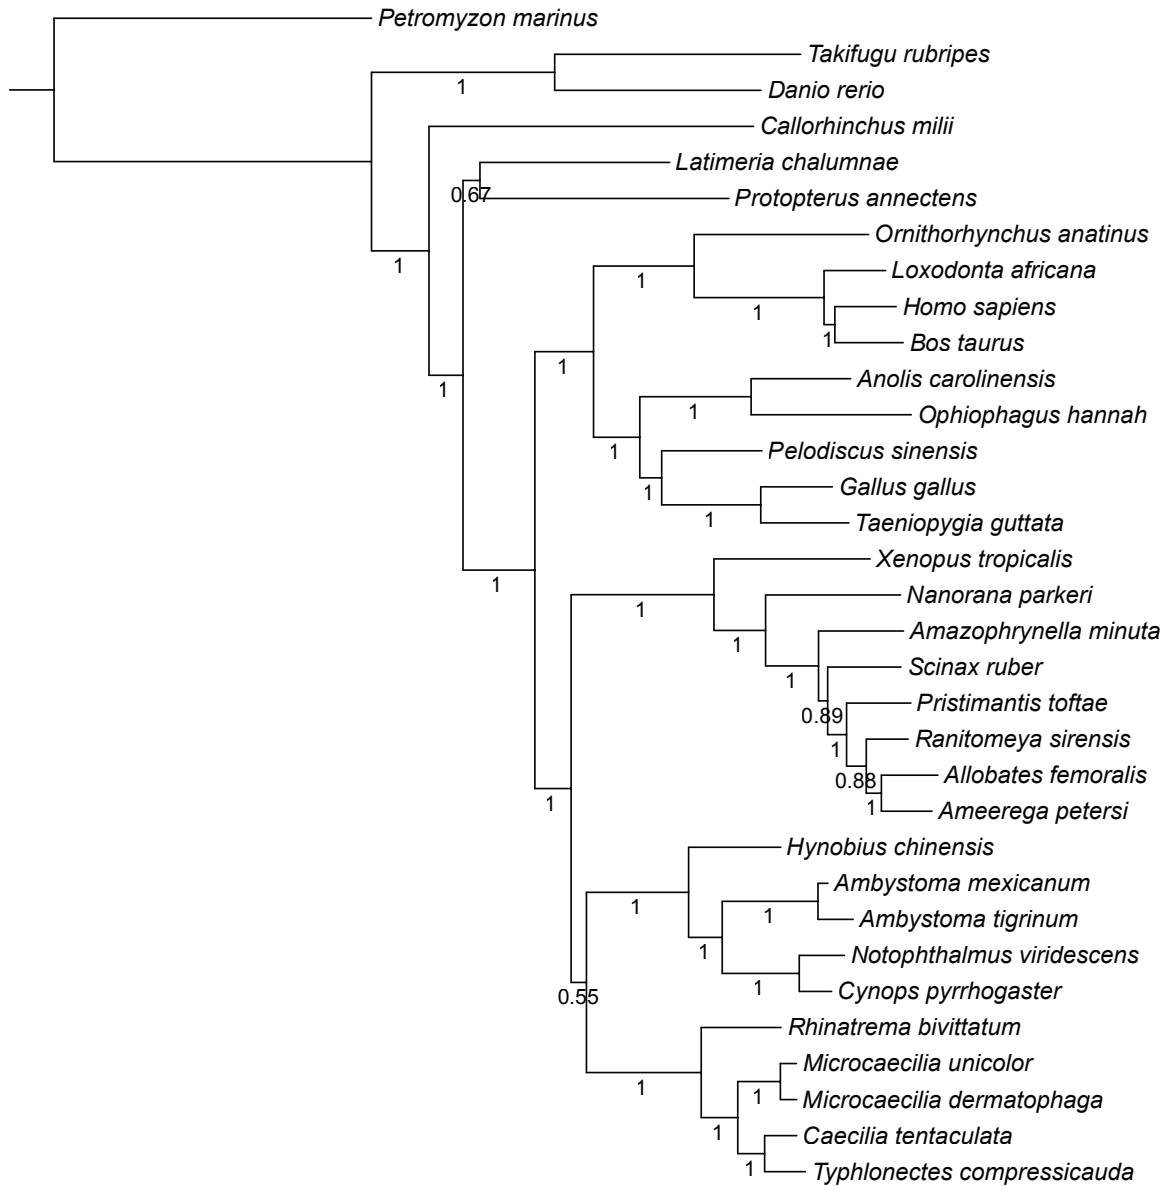

**Supplementary Fig. S5.** Resulting tree inferred with a concatenated alignment of Dataset 2019 using the Maximum Likelihood method in RAxML specifying individual models for each gene partition. Bootstrap support values provided under each node converted to a scale from 0-1, maximum support = 1. See methods for further details.

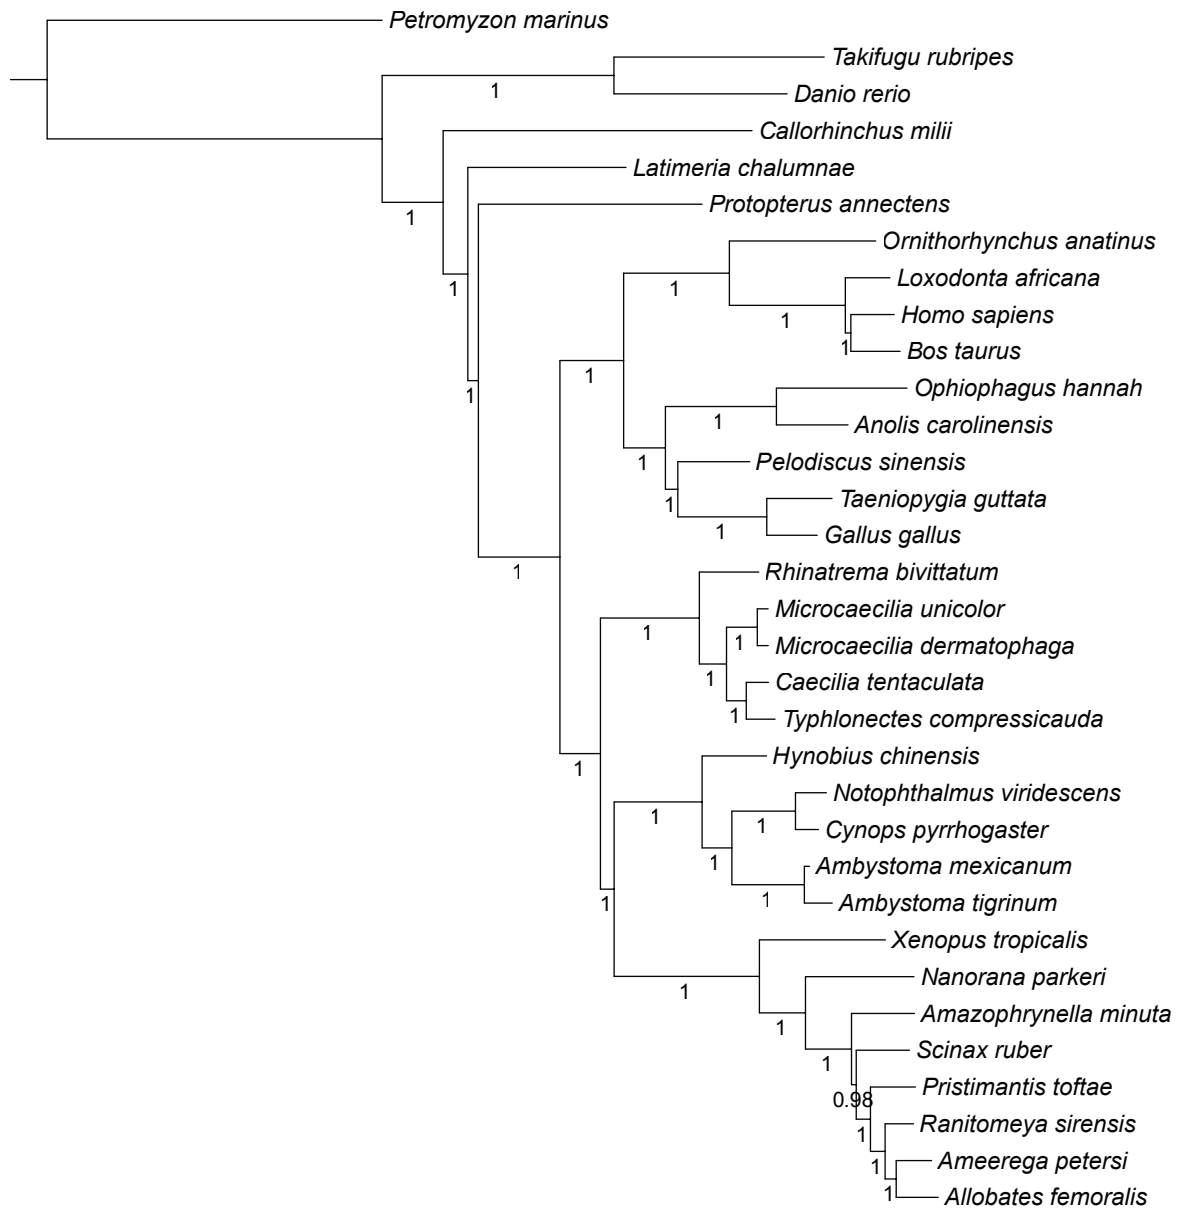

**Supplementary Fig. S6.** Resulting tree inferred with a concatenated alignment of Dataset 2019 using the Bayesian inference method in Phylobayes-MPI with the CAT-GTR model. Posterior probability support values are provided under each node, maximum support = 1. See methods for further details.

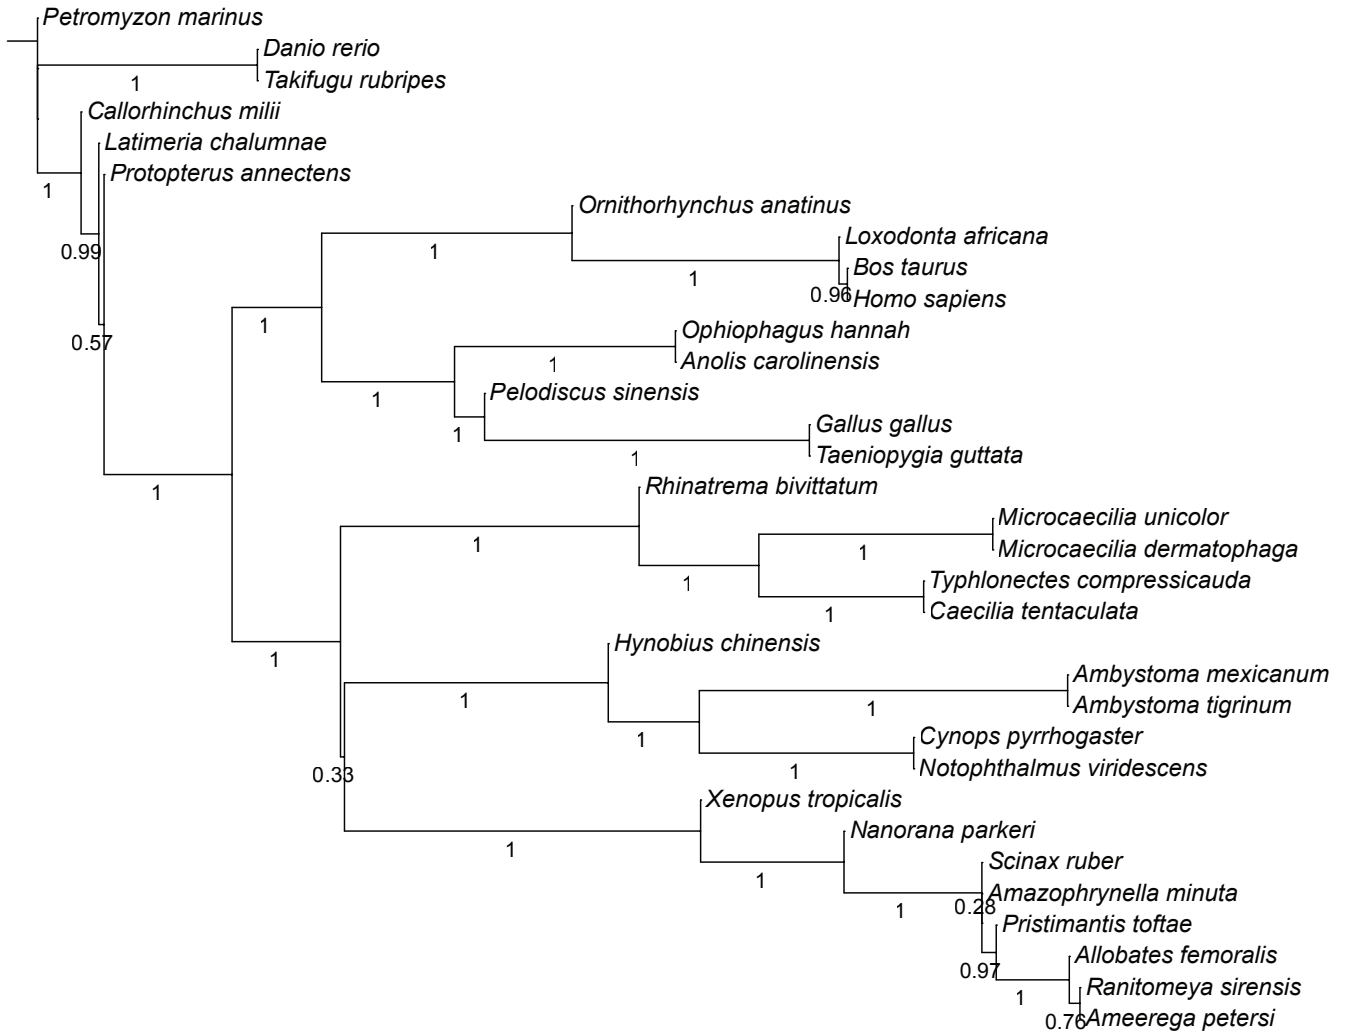

**Supplementary Fig. S7.** Resulting tree inferred with input gene trees from Dataset 2019 using the Quartet based supertree method ASTRAL-II. Local posterior probability support values are provided under each node, maximum support = 1. See methods for further details.



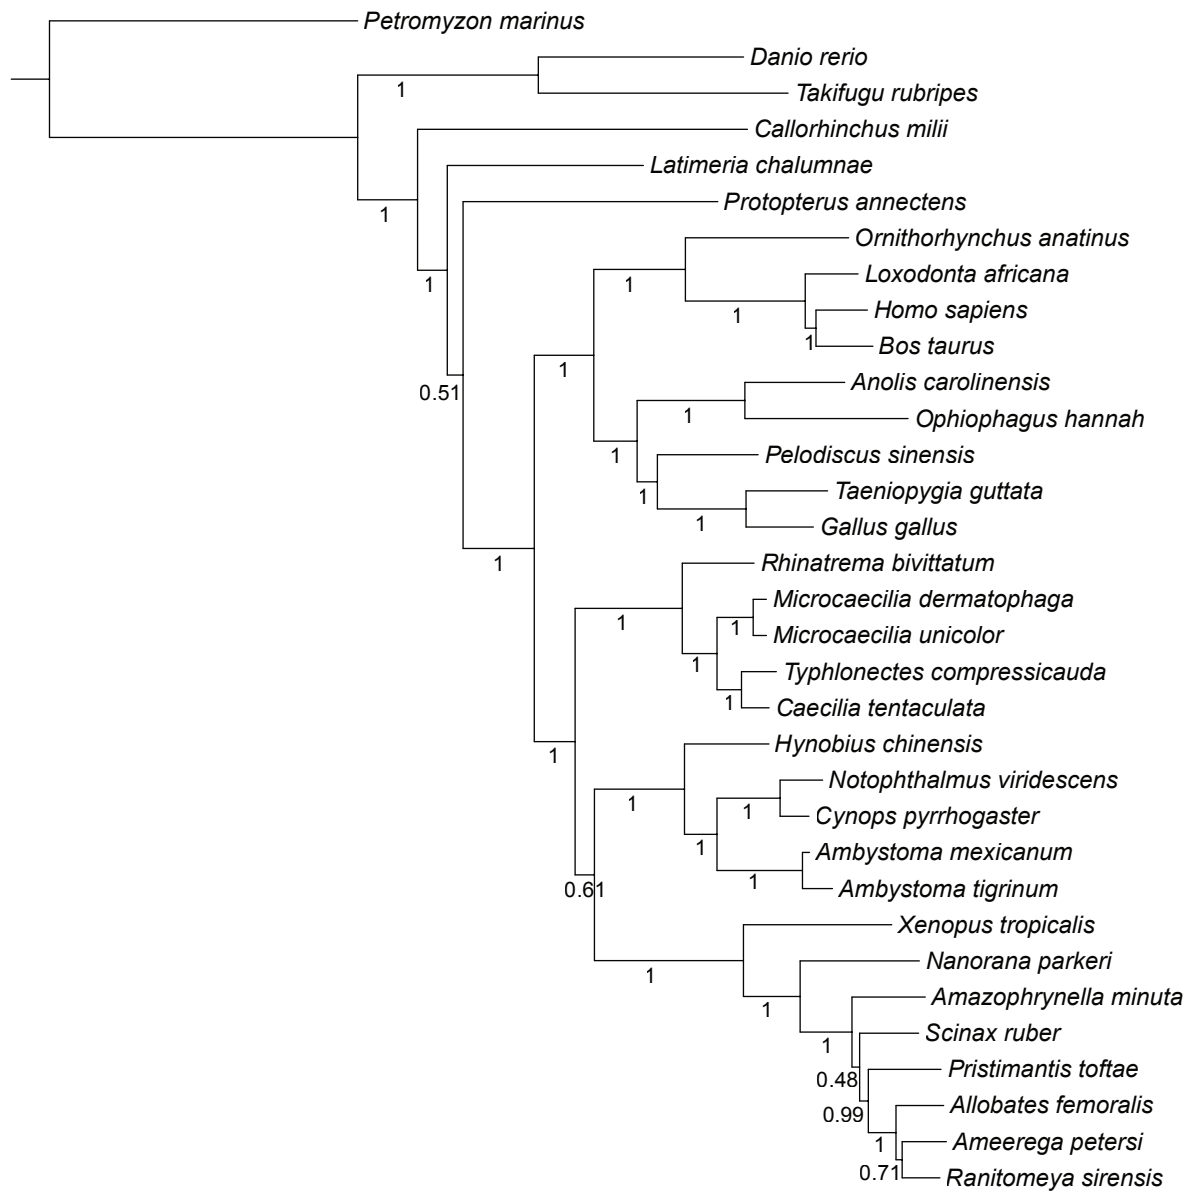

**Supplementary Fig. S8.** Resulting tree inferred with a concatenated alignment of Dataset 348 using the Maximum Likelihood method in RAxML specifying individual models for each gene partition. Bootstrap support values provided under each node converted to a scale from 0-1, maximum support = 1. See methods for further details.

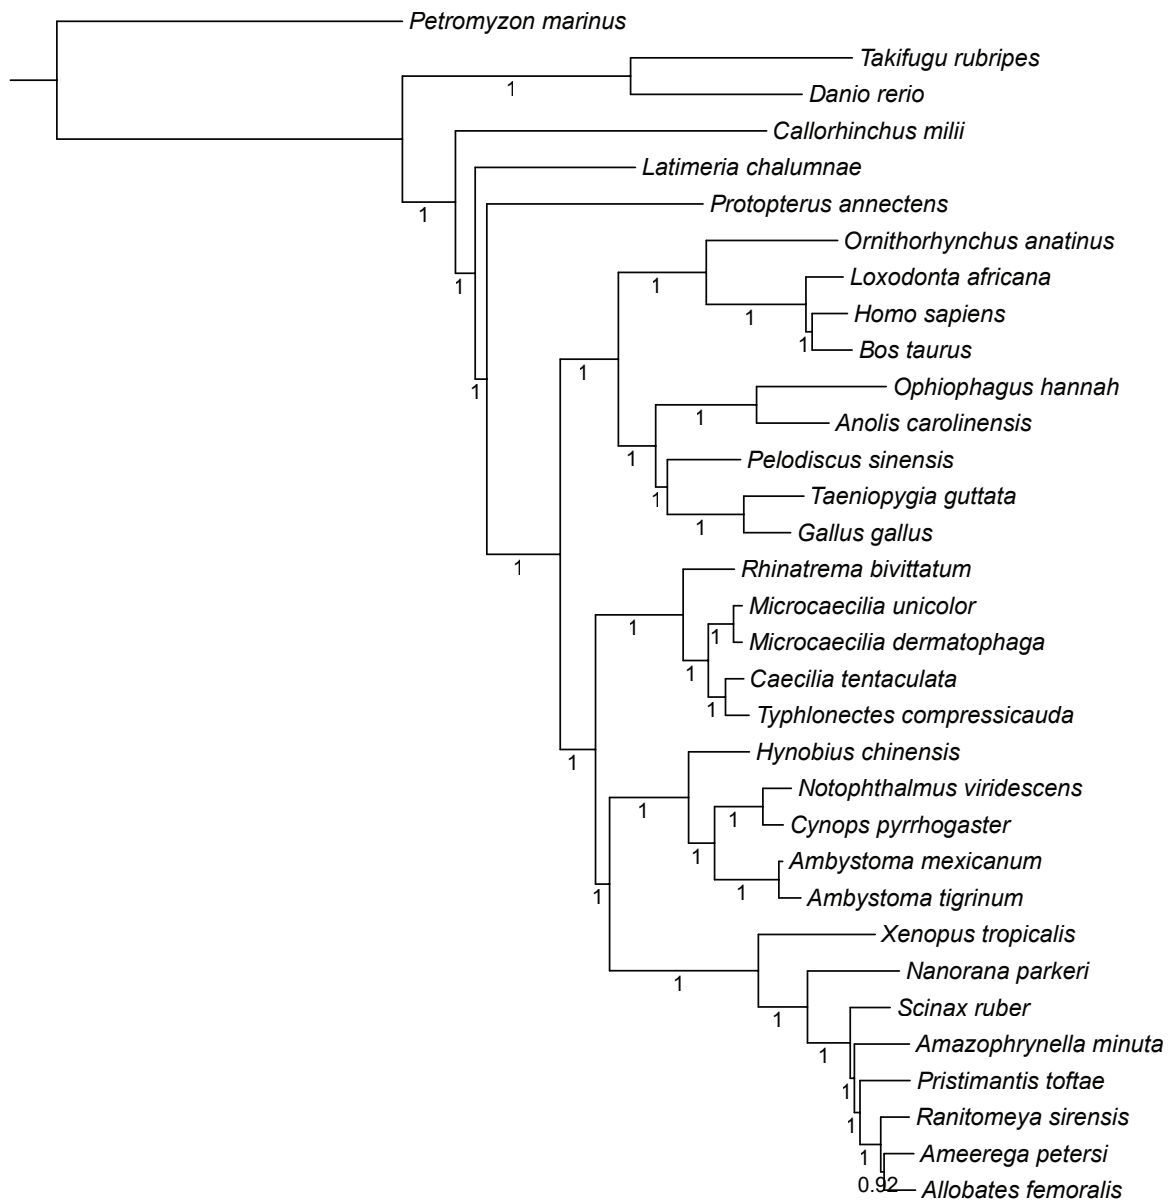

**Supplementary Fig. S9.** Resulting tree inferred with a concatenated alignment of Dataset 348 using the Bayesian inference method in Phylobayes-MPI with the CAT-GTR model. Posterior probability support values are provided under each node, maximum support = 1. See methods for further details.

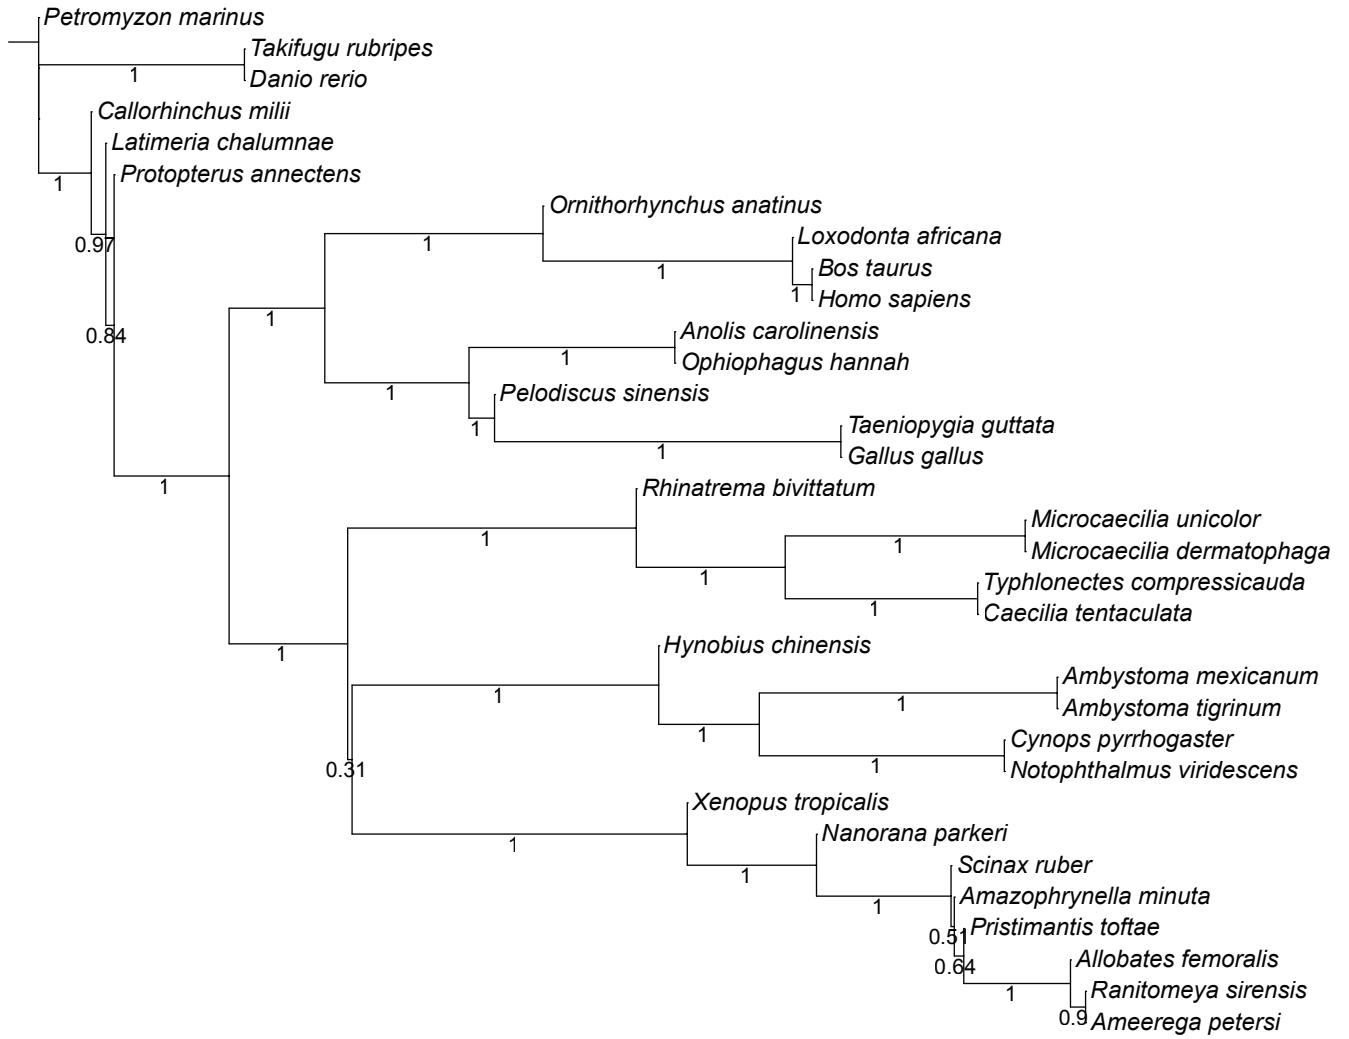

**Supplementary Fig. S10.** Resulting tree inferred with input gene trees from Dataset 348 using the Quartet based supertree method ASTRAL-II. Local posterior probability support values are provided under each node, maximum support = 1. See methods for further details.

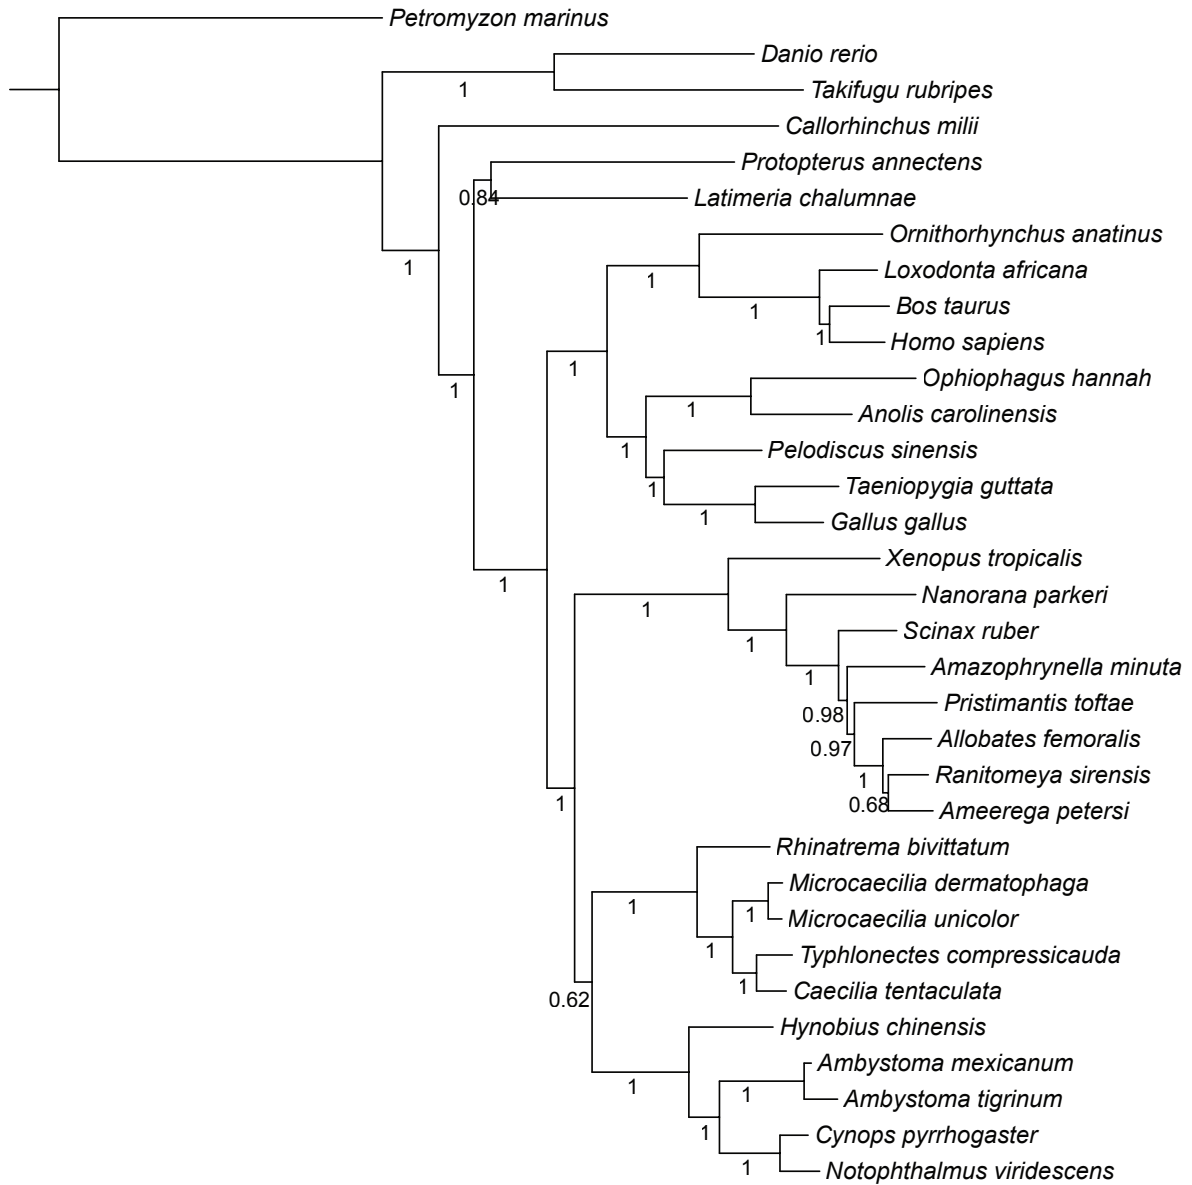

**Supplementary Fig. S11.** Resulting tree inferred with a concatenated alignment of Dataset 768 using the Maximum Likelihood method in RAxML specifying individual models for each gene partition. Bootstrap support values provided under each node converted to a scale from 0-1, maximum support = 1. See methods for further details.

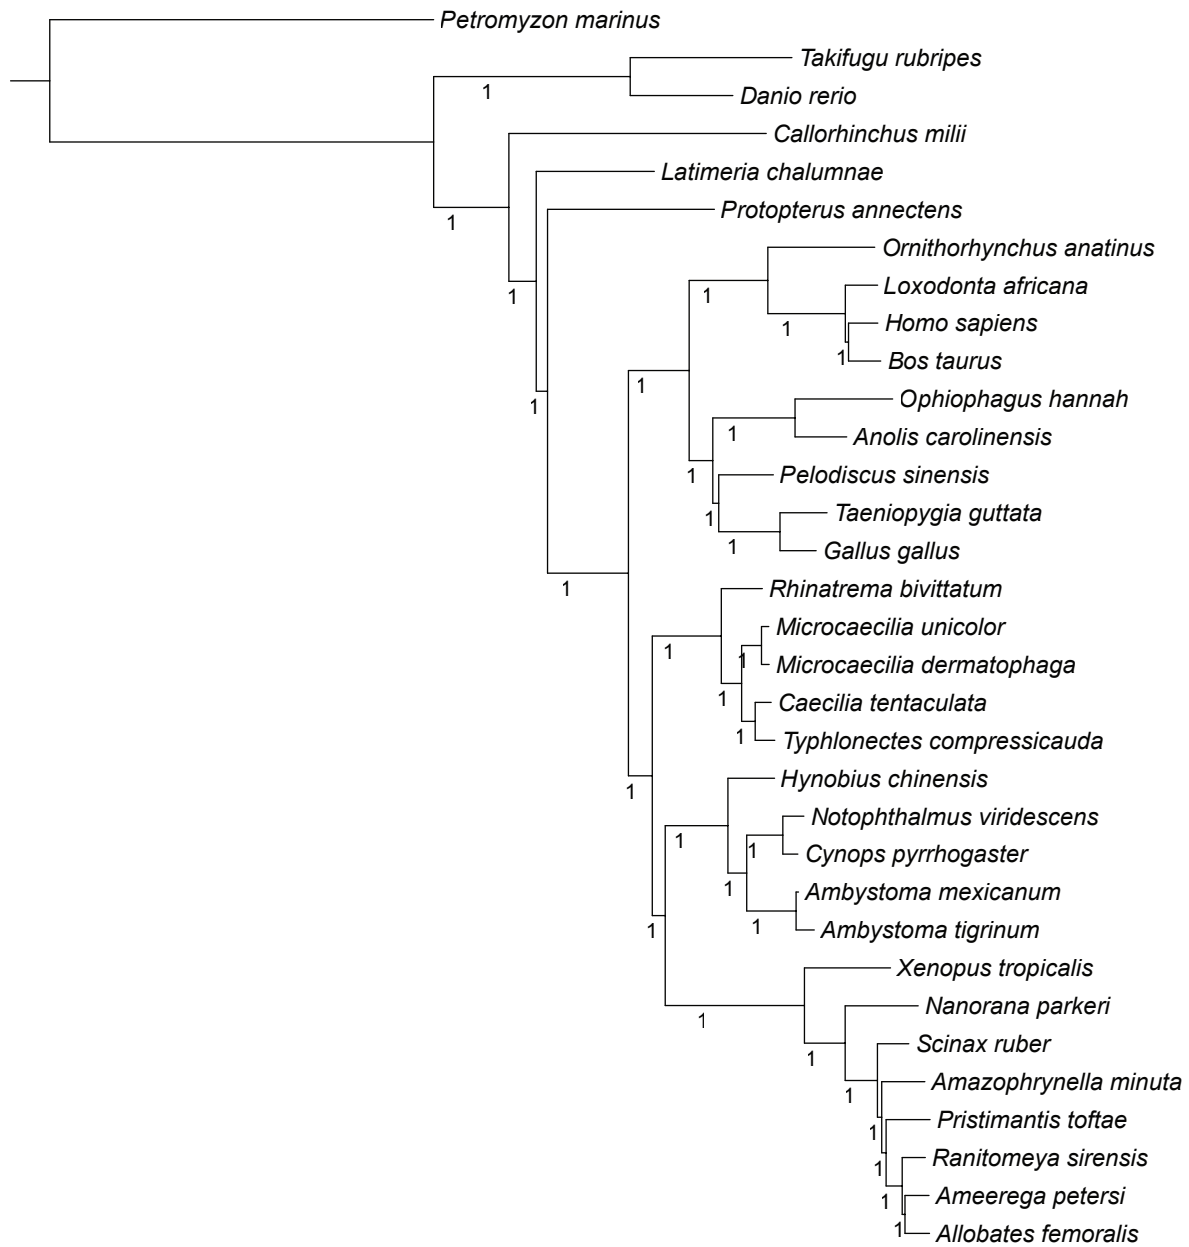

**Supplementary Fig. S12.** Resulting tree inferred with a concatenated alignment of Dataset 768 using the Bayesian inference method in Phylobayes-MPI with the CAT-GTR model. Posterior probability support values are provided under each node, maximum support = 1. See methods for further details.

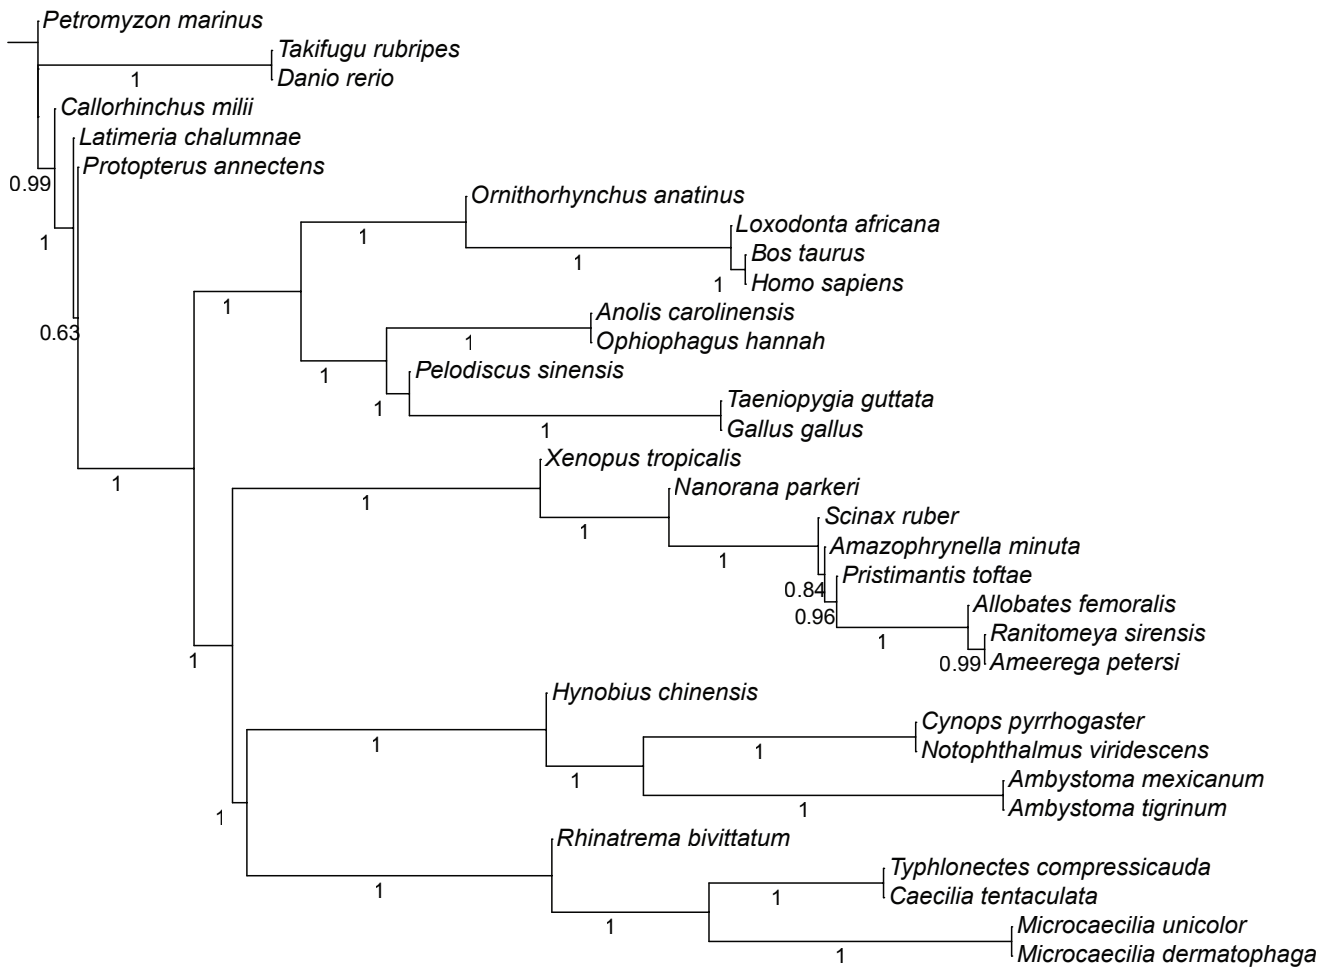

**Supplementary Fig. S13.** Resulting tree inferred with input gene trees from Dataset 768 using the Quartet based supertree method ASTRAL-II. Local posterior probability support values are provided under each node, maximum support = 1. See methods for further details.

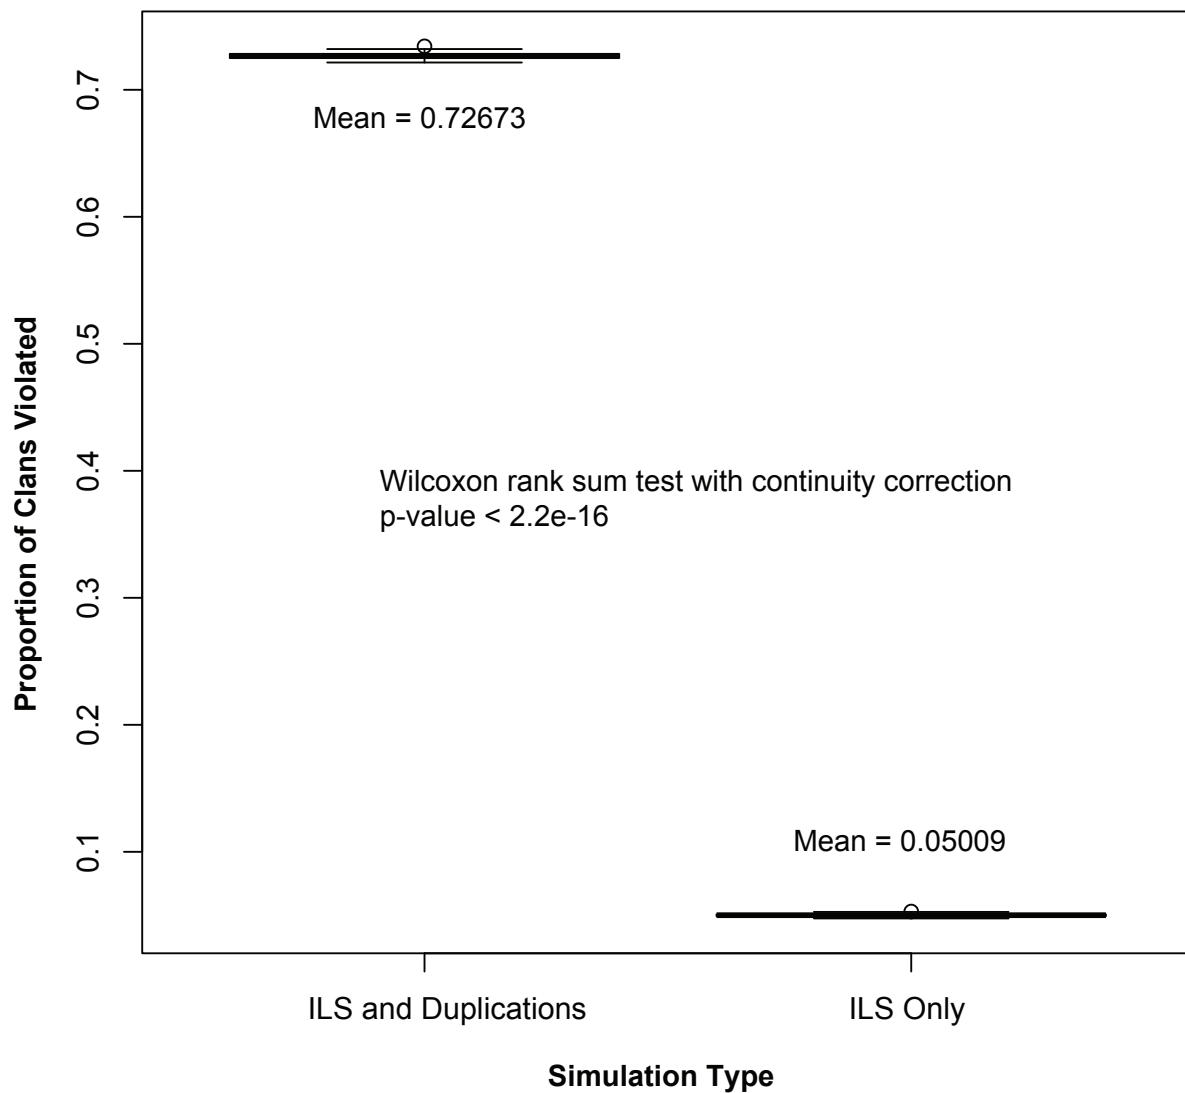

**Supplementary Fig. S14.** Boxplot of simulation results of Clan-Check in the presence of Incomplete Lineage Sorting (ILS) only or ILS with Early Duplications and Late Loss (100 reps).

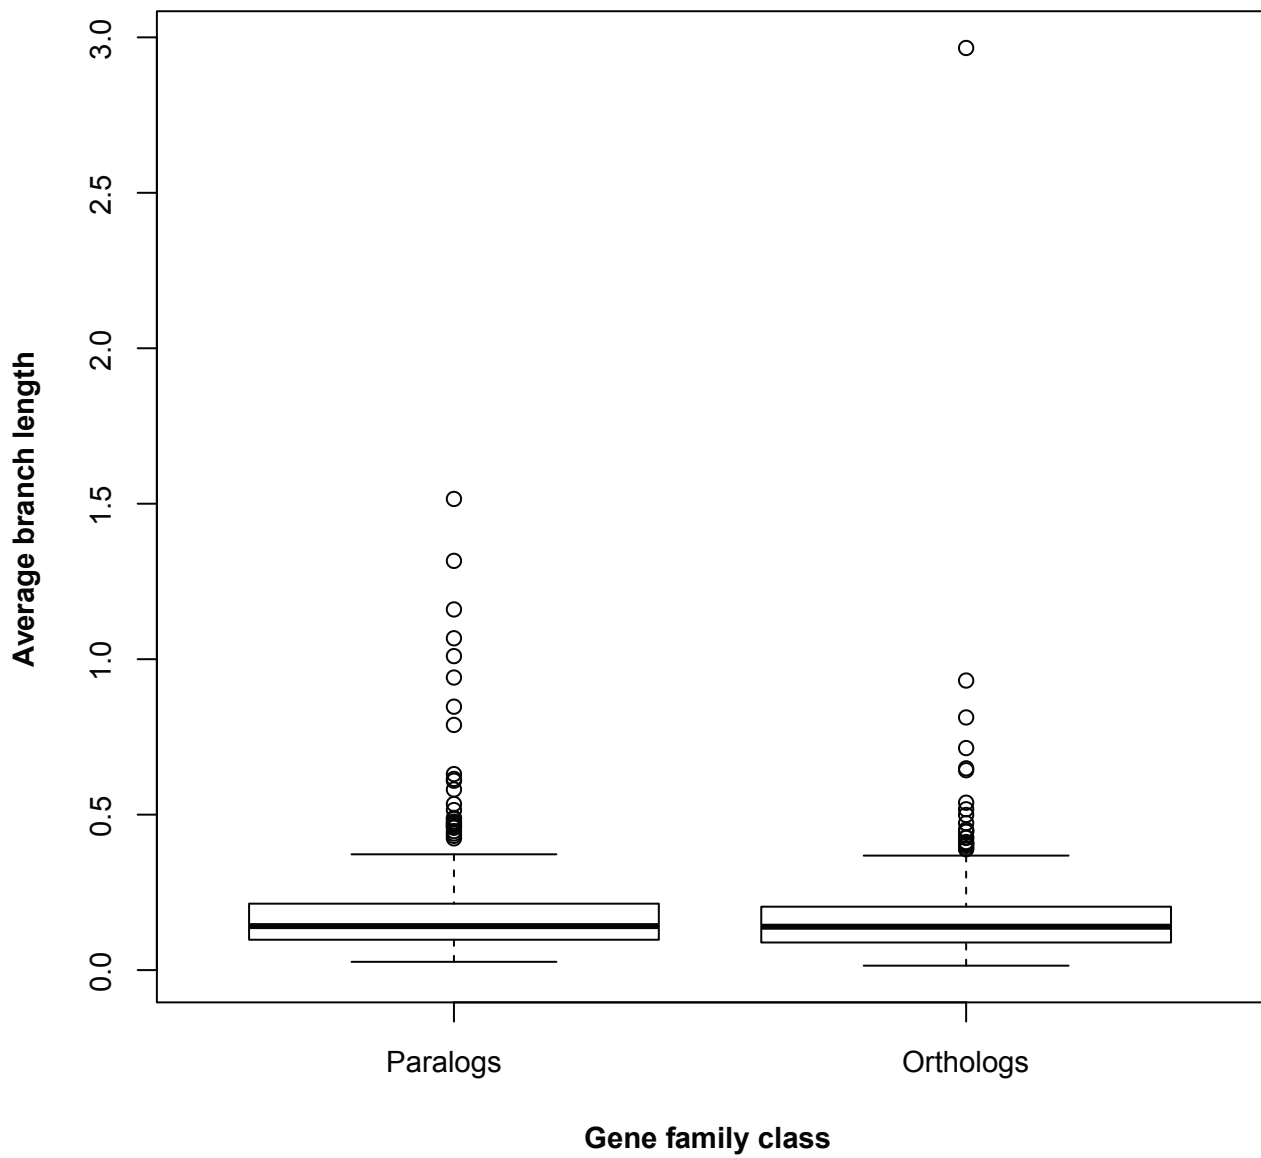

**Supplementary Fig. S15.** Average branch lengths of gene families classified as putative orthologs and paralogs by Clan-Check



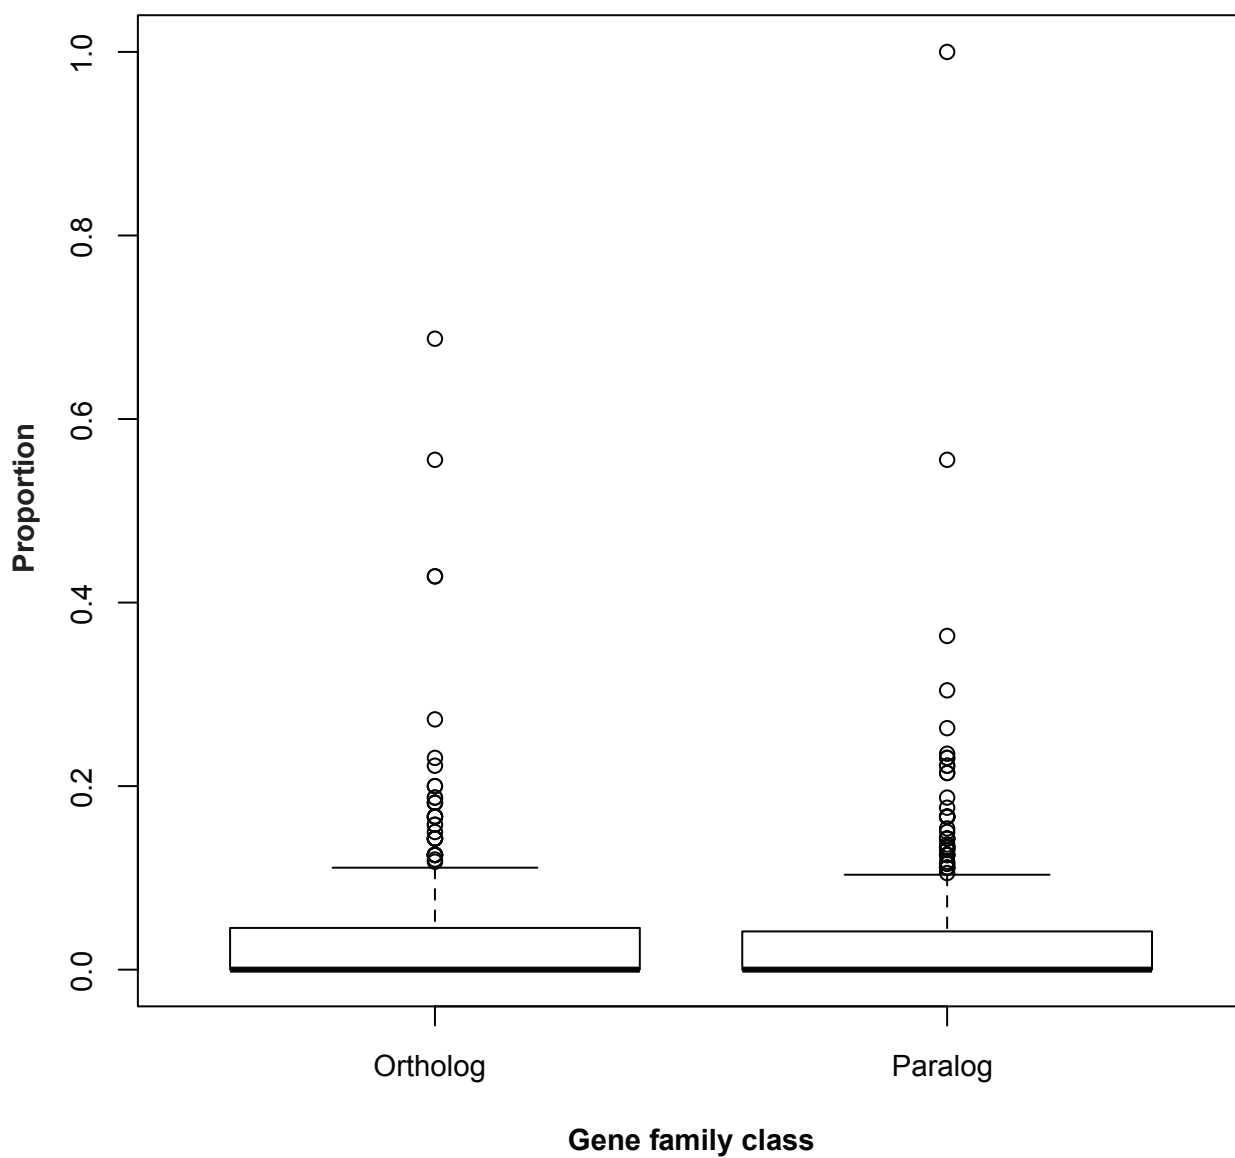

**Supplementary Fig. S16.** Comparison of the proportion of taxa that failed the compositional heterogeneity test after their classification as putative orthologs and paralogs from Clan-Check.

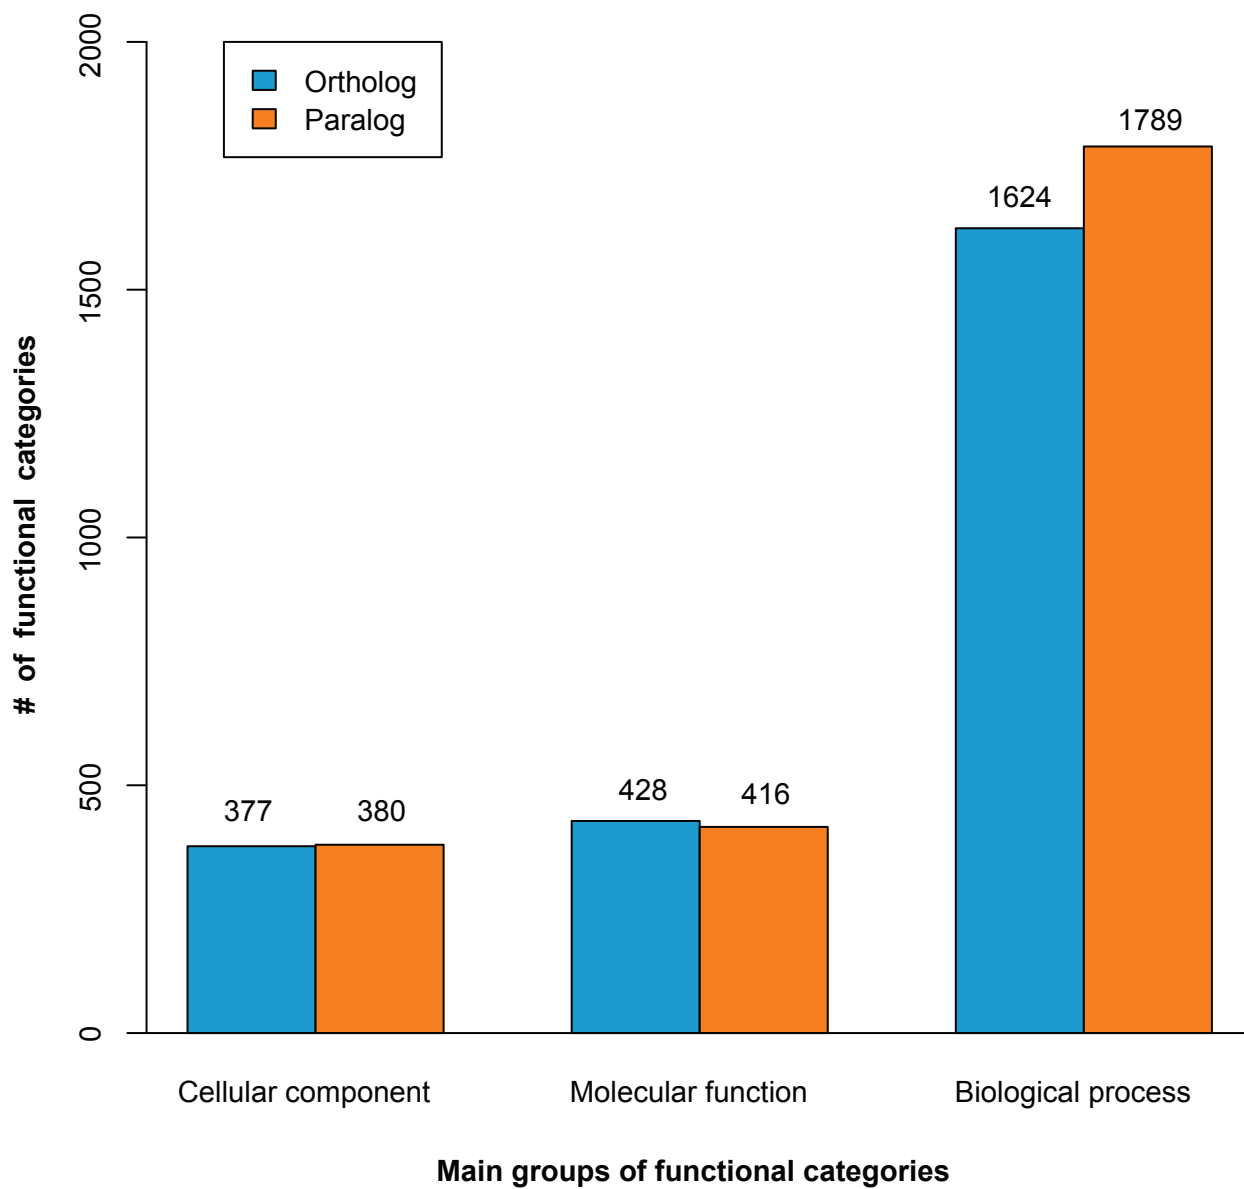

**Supplementary Fig. S17.** Comparison of main functional categories between putative orthologs and paralogs from Clan-Check.

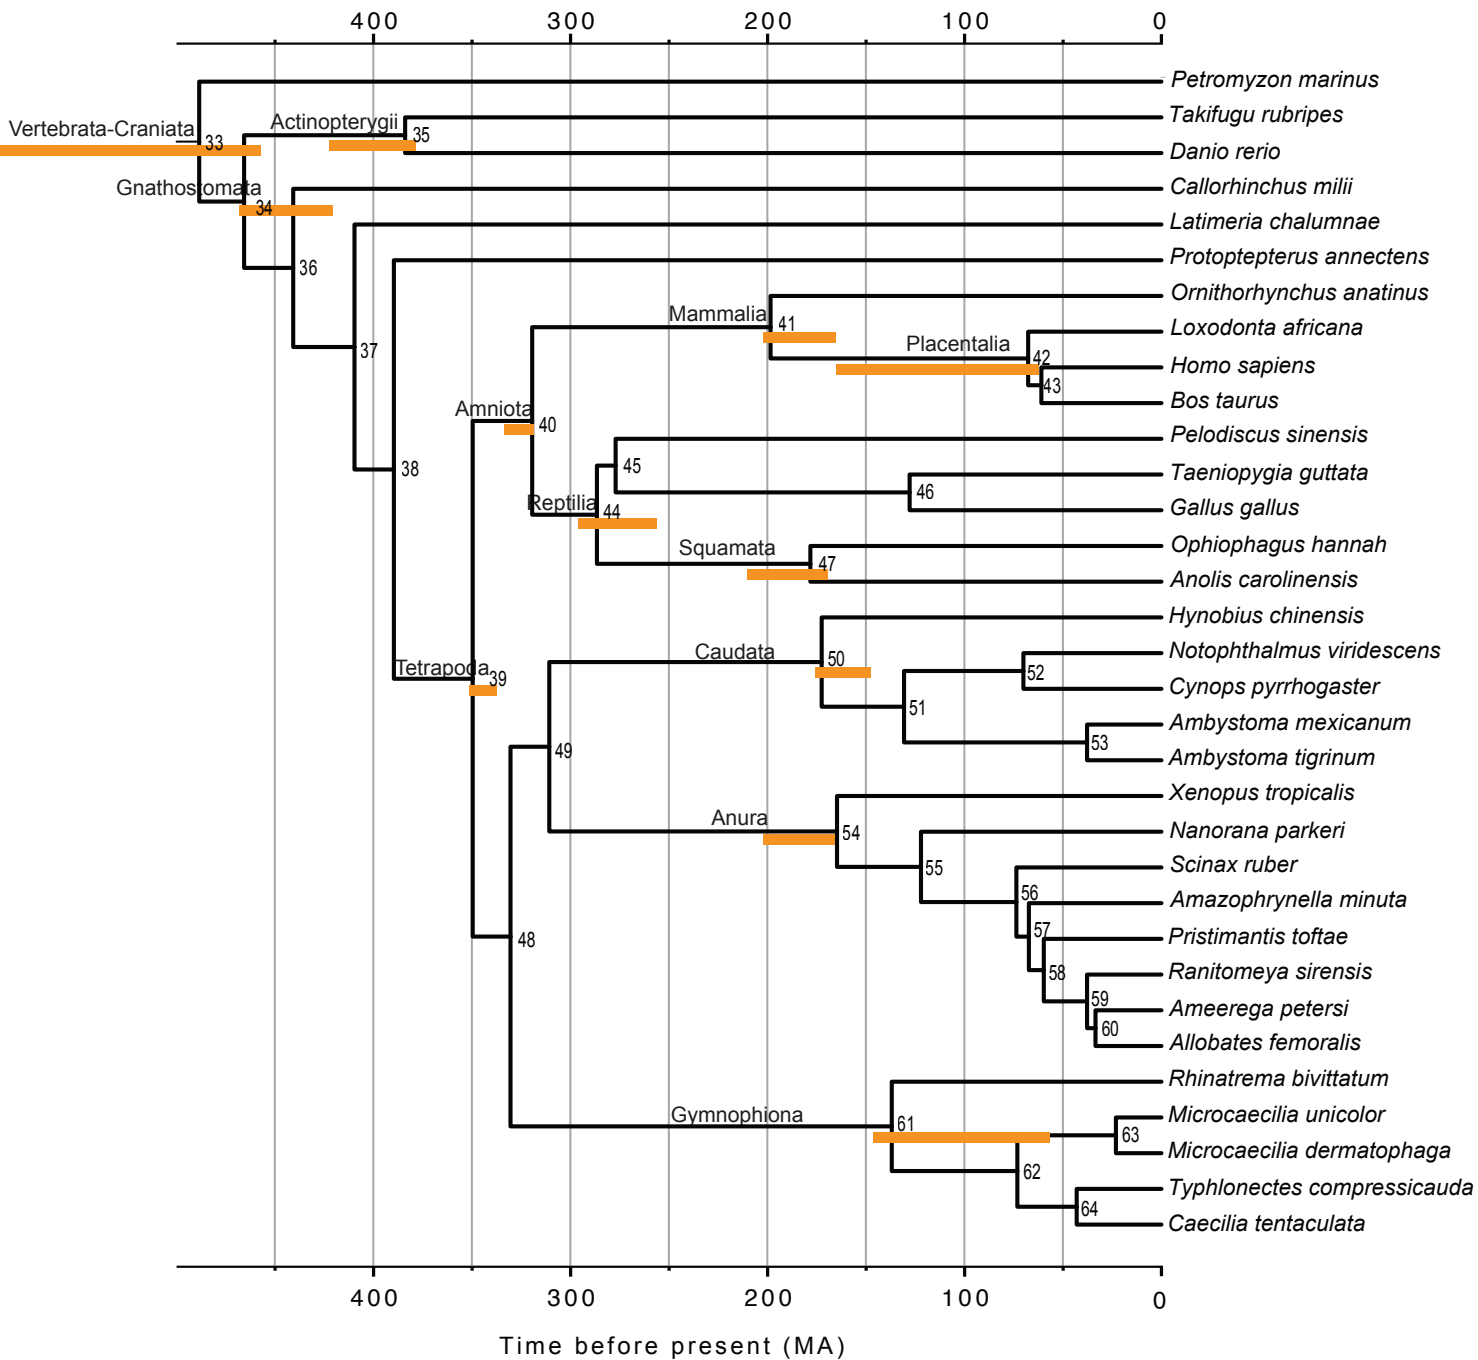

**Supplementary Fig. S18.** Timetree for Dataset 348 using Phylobayes. Node label numbers below branches correspond to Supplementary Table S3 and calibration ranges used (specified in Supplementary Table S6) are coloured in orange. Timescale in million years. See methods for more details.

**Supplementary Table S3.** Divergence times estimated for Dataset 348 using Phylobayes. Table of divergence time estimates with 95% Confidence Intervals for the nodes labelled in Supp. Fig. S18.

| Node label | Mean Age | Standard Error | Inf95   | Sup95   |
|------------|----------|----------------|---------|---------|
| 33         | 488.422  | 4.57545        | 481.086 | 496.928 |
| 34         | 465.624  | 3.06164        | 459.226 | 470.882 |
| 35         | 383.896  | 5.0695         | 376.402 | 395.294 |
| 36         | 440.707  | 4.55091        | 433.599 | 450.785 |
| 37         | 409.601  | 6.67461        | 397.867 | 419.013 |
| 38         | 389.606  | 4.16264        | 381.264 | 397.655 |
| 39         | 349.603  | 1.40998        | 346.148 | 351.638 |
| 40         | 319.407  | 1.46383        | 317.168 | 322.586 |
| 41         | 198.414  | 4.00119        | 188.583 | 204.24  |
| 42         | 67.6721  | 10.9624        | 52.8137 | 88.7575 |
| 43         | 60.9628  | 10.495         | 47.798  | 81.1955 |
| 44         | 286.545  | 2.96186        | 280.618 | 291.862 |
| 45         | 277.055  | 3.38867        | 269.937 | 283.062 |
| 46         | 127.827  | 14.8846        | 91.4406 | 145.073 |
| 47         | 178.207  | 7.0291         | 168.173 | 192.914 |
| 48         | 330.412  | 2.07376        | 325.819 | 334.067 |
| 49         | 310.728  | 2.82401        | 305.063 | 315.796 |
| 50         | 172.471  | 3.71821        | 162.954 | 177.022 |
| 51         | 130.664  | 6.7202         | 116.261 | 140.668 |
| 52         | 70.0814  | 10.3068        | 48.7022 | 87.3312 |
| 53         | 37.7724  | 9.8825         | 22.2936 | 56.9606 |
| 54         | 164.684  | 2.07433        | 159.965 | 168.691 |
| 55         | 122.06   | 3.267          | 115.413 | 128.987 |
| 56         | 73.6407  | 4.31858        | 66.3474 | 81.5789 |
| 57         | 67.2945  | 4.24311        | 60.4368 | 74.9928 |
| 58         | 59.7251  | 3.5404         | 53.7868 | 66.2106 |
| 59         | 37.7747  | 3.96415        | 32.0978 | 47.4017 |
| 60         | 33.4867  | 3.96949        | 26.8153 | 43.1129 |
| 61         | 136.893  | 7.71684        | 121.412 | 151.16  |
| 62         | 73.156   | 9.85178        | 57.3148 | 94.2496 |
| 63         | 23.1222  | 6.27723        | 12.9863 | 38.5273 |
| 64         | 43.0373  | 8.04296        | 28.7283 | 62.1037 |

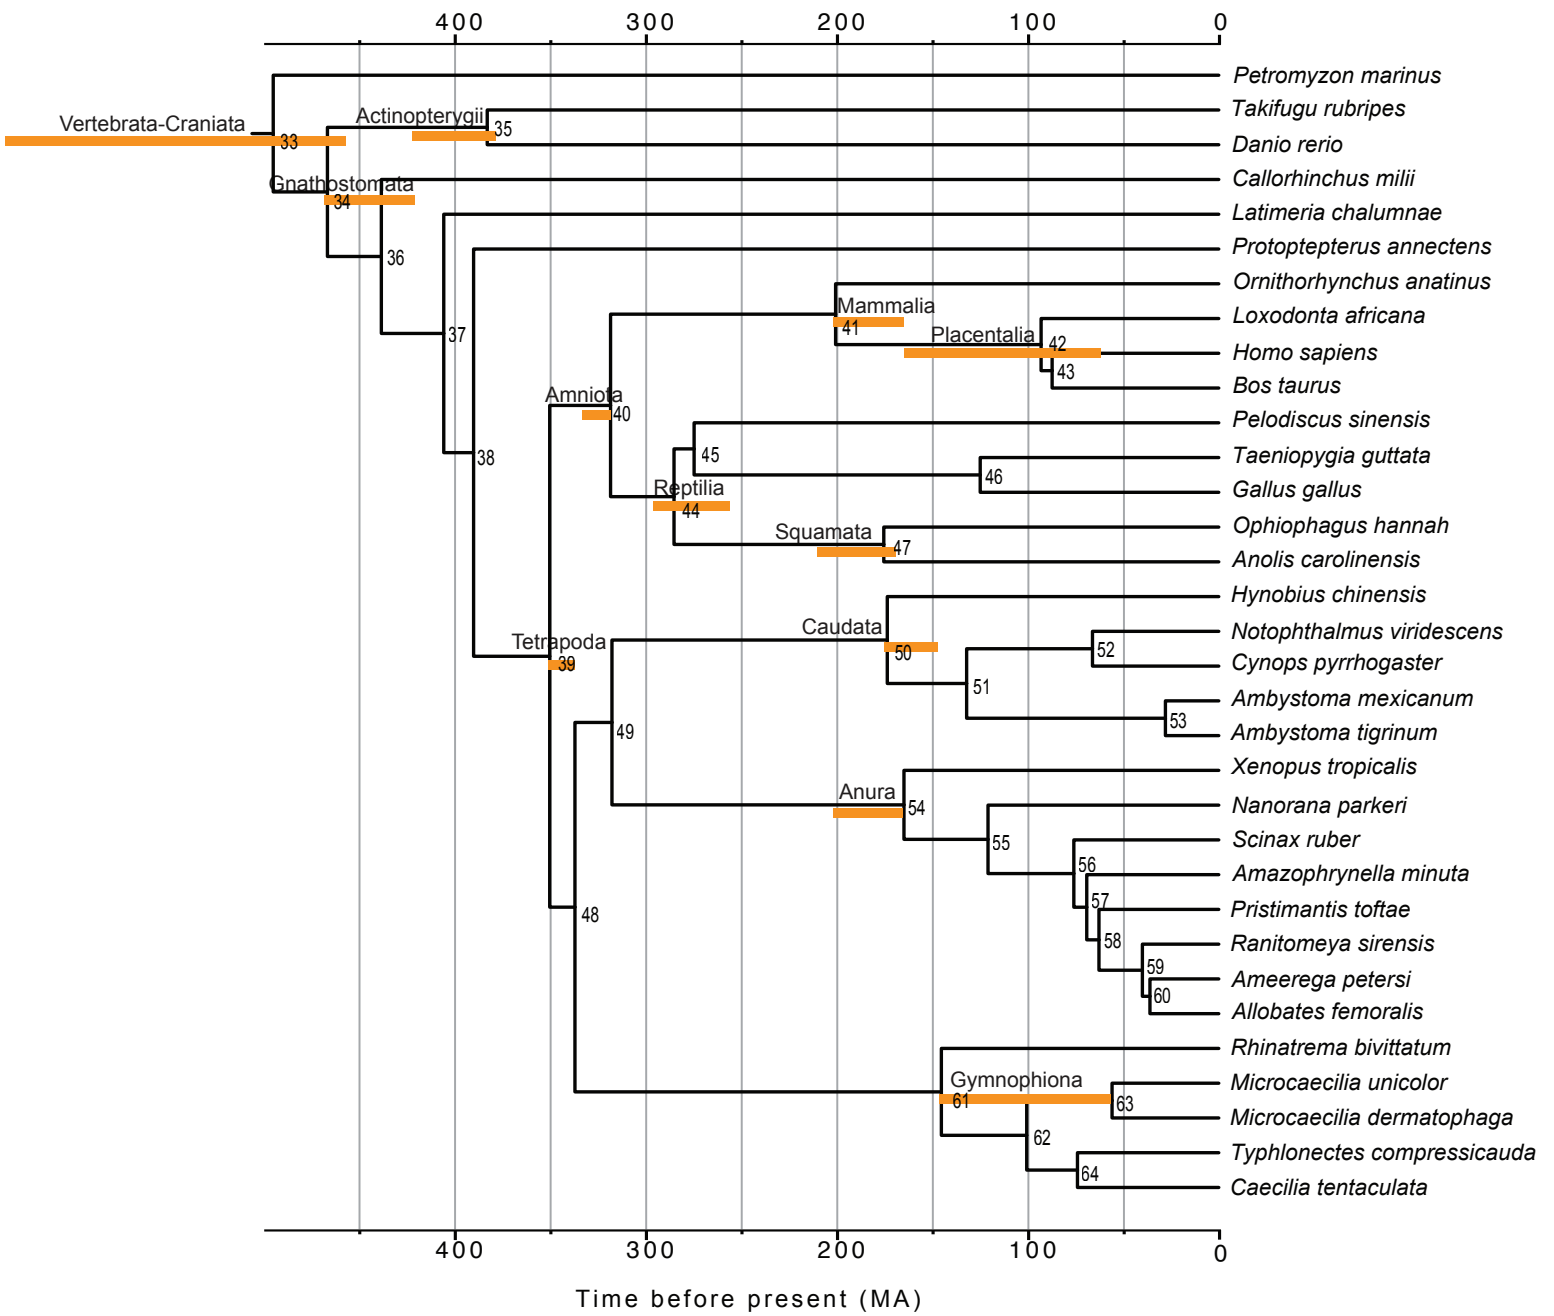

**Supplementary Fig. S19.** Timetree for Dataset 768 using Phylobayes. Node label numbers below branches correspond to Supplementary Table S4 and calibration ranges used (specified in Supplementary Table S6) are coloured in orange. Timescale in million years. See methods for more details.

**Supplementary Table S4.** Divergence times estimated for Dataset 768 using Phylobayes. Table of divergence time estimates with 95% Confidence Intervals for the nodes labelled in Supp. Fig. S19.

| Node label | Mean Age | Standard Error | Inf95   | Sup95   |
|------------|----------|----------------|---------|---------|
| 33         | 494.969  | 2.92462        | 489.378 | 501.138 |
| 34         | 466.591  | 2.47571        | 460.895 | 470.657 |
| 35         | 382.947  | 3.96739        | 375.311 | 390.253 |
| 36         | 438.373  | 2.84212        | 433.044 | 444.232 |
| 37         | 405.702  | 2.96252        | 399.902 | 411.786 |
| 38         | 390.086  | 3.14088        | 384.015 | 397.133 |
| 39         | 350.244  | 1.02198        | 348.064 | 351.966 |
| 40         | 318.393  | 1.09792        | 316.653 | 321.597 |
| 41         | 200.592  | 2.30553        | 194.542 | 204.99  |
| 42         | 93.0231  | 8.45044        | 80.5981 | 106.611 |
| 43         | 87.2498  | 7.86303        | 75.6122 | 100.269 |
| 44         | 285.176  | 4.45949        | 276.293 | 292.905 |
| 45         | 274.66   | 4.81497        | 266.232 | 283.411 |
| 46         | 124.897  | 12.2958        | 104.326 | 143.4   |
| 47         | 175.369  | 7.08783        | 167.502 | 192.076 |
| 48         | 337.03   | 1.20629        | 334.575 | 339.435 |
| 49         | 317.66   | 2.32494        | 312.345 | 321.3   |
| 50         | 173.54   | 2.67824        | 166.739 | 177.612 |
| 51         | 132.007  | 4.91611        | 123.547 | 141.051 |
| 52         | 66.1327  | 9.70155        | 47.6433 | 82.7467 |
| 53         | 27.9523  | 7.68796        | 17.2345 | 45.5489 |
| 54         | 164.802  | 1.99606        | 160.03  | 168.507 |
| 55         | 120.816  | 4.42399        | 111.284 | 128.394 |
| 56         | 75.8861  | 5.9407         | 64.8909 | 88.1292 |
| 57         | 69.126   | 5.11904        | 60.3623 | 80.0739 |
| 58         | 62.7335  | 4.50976        | 55.6934 | 72.5264 |
| 59         | 40.0079  | 3.2461         | 35.2735 | 47.4931 |
| 60         | 36.0511  | 3.11988        | 30.9476 | 43.2964 |
| 61         | 145.232  | 5.07125        | 135.432 | 156.321 |
| 62         | 100.555  | 7.05045        | 86.6792 | 114.306 |
| 63         | 55.8859  | 11.1968        | 33.4971 | 74.1374 |
| 64         | 73.99    | 9.47949        | 53.8639 | 90.3964 |

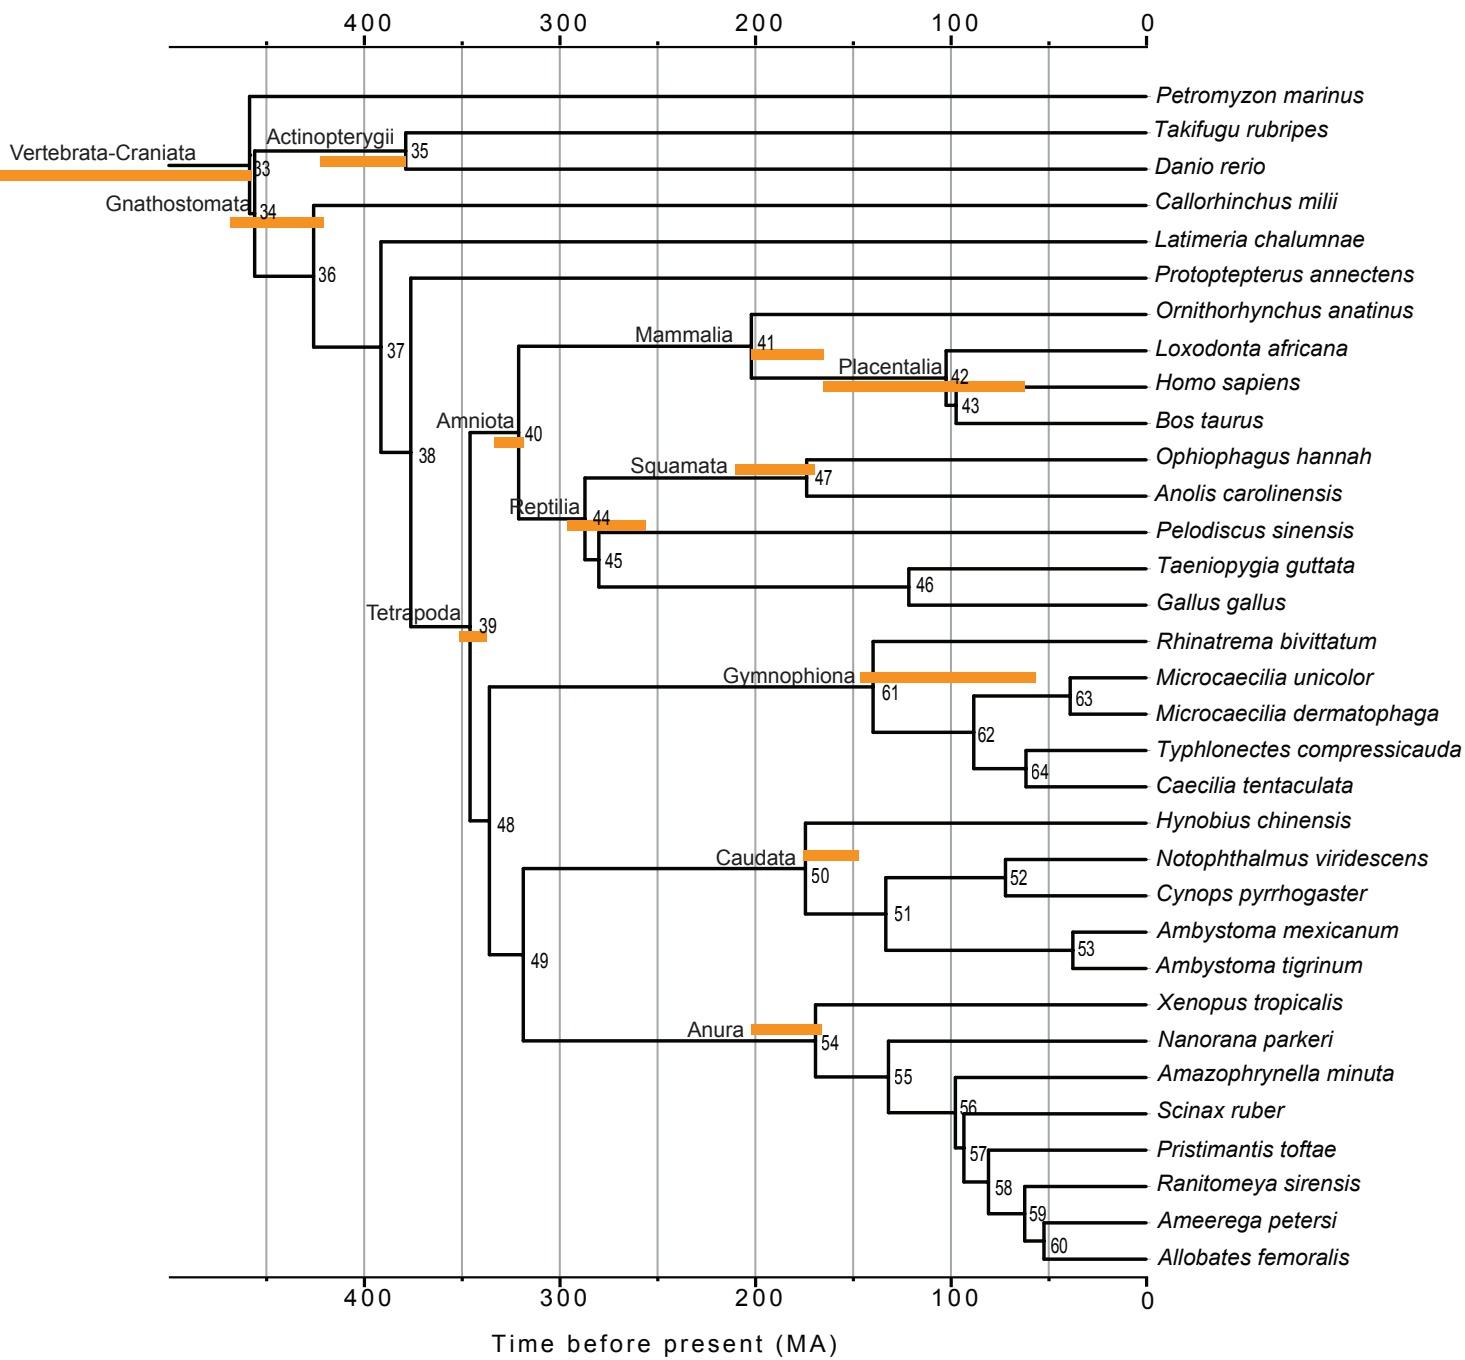

**Supplementary Fig. S20.** Timetree for Dataset 2656 using Phylobayes. Node label numbers below branches correspond to Supplementary Table S5 and calibration ranges used (specified in Supplementary Table S6) are coloured in orange. Timescale in million years. See methods for more details.

**Supplementary Table S5.** Divergence times estimated for Dataset 2556 using Phylobayes. Table of divergence time estimates with 95% Confidence Intervals for the nodes labelled in Supp. Fig. S20.

| Node label | Mean Age | Standard Error | Inf95   | Sup95   |
|------------|----------|----------------|---------|---------|
| 33         | 458.801  | 3.3881         | 453.324 | 464.475 |
| 34         | 456.196  | 3.29088        | 450.795 | 461.767 |
| 35         | 378.878  | 1.59156        | 375.723 | 382.363 |
| 36         | 426.014  | 4.94787        | 419.242 | 434.427 |
| 37         | 391.567  | 4.44593        | 384.499 | 399.113 |
| 38         | 376.282  | 3.68181        | 369.886 | 382.888 |
| 39         | 345.955  | 2.75733        | 341.539 | 350.844 |
| 40         | 321.089  | 2.12497        | 317.983 | 325.379 |
| 41         | 201.992  | 1.6471         | 199.306 | 205.999 |
| 42         | 102.316  | 1.19856        | 100.455 | 104.763 |
| 43         | 97.1788  | 1.23179        | 94.8413 | 99.5512 |
| 44         | 287.146  | 1.66443        | 283.126 | 290.212 |
| 45         | 280.049  | 1.8204         | 275.446 | 283.01  |
| 46         | 121.396  | 4.3102         | 111.222 | 128.034 |
| 47         | 173.682  | 4.22598        | 166.975 | 181.377 |
| 48         | 336.051  | 2.42221        | 332.04  | 340.53  |
| 49         | 318.71   | 1.68159        | 315.158 | 321.829 |
| 50         | 174.312  | 1.93886        | 171.218 | 179.218 |
| 51         | 133.172  | 3.7247         | 127.77  | 141.509 |
| 52         | 71.9191  | 4.79906        | 64.9214 | 82.4879 |
| 53         | 37.4378  | 5.58574        | 28.9833 | 49.4927 |
| 54         | 169.153  | 1.53535        | 166.113 | 172.552 |
| 55         | 131.817  | 1.61692        | 128.897 | 135.178 |
| 56         | 97.5599  | 1.35021        | 95.197  | 100.858 |
| 57         | 93.2051  | 1.46763        | 90.8623 | 96.5541 |
| 58         | 80.6233  | 1.54893        | 77.5165 | 83.5941 |
| 59         | 62.0801  | 2.45784        | 57.8647 | 66.0734 |
| 60         | 52.2203  | 3.08893        | 46.5728 | 57.5041 |
| 61         | 139.68   | 3.41711        | 133.291 | 145.548 |
| 62         | 88.1503  | 2.66056        | 83.2045 | 92.3102 |
| 63         | 38.8049  | 3.64651        | 32.7735 | 47.0941 |
| 64         | 61.4271  | 2.5559         | 57.0393 | 66.1163 |



**Supplementary Table S6.** Calibration time points (Mya) used in the timetree analyses.

| Node                | Node Maximum Age (Mya) | Node Minimum Age (Mya) | Source                                   |
|---------------------|------------------------|------------------------|------------------------------------------|
| Vertebrata-Craniata | 636.1                  | 457.5                  | (Benton et al. 2015; Ksepka et al. 2015) |
| Gnathostomata       | 468.4                  | 420.7                  | (Benton et al. 2015; Ksepka et al. 2015) |
| Actinopterygii      | 422.4                  | 378.19                 | (Benton et al. 2015; Ksepka et al. 2015) |
| Tetrapoda           | 351                    | 337                    | (Benton et al. 2015; Ksepka et al. 2015) |
| Anura               | 201.5                  | 165.3                  | (Benton et al. 2015; Ksepka et al. 2015) |
| Caudata             | 175.1                  | 146.8                  | (Benton et al. 2015; Ksepka et al. 2015) |
| Gymnophiona         | 145.8                  | 56                     | (Benton et al. 2015; Ksepka et al. 2015) |
| Mammalia            | 201.5                  | 164.9                  | (Benton et al. 2015; Ksepka et al. 2015) |
| Placentalia         | 164.6                  | 61.6                   | (Benton et al. 2015; Ksepka et al. 2015) |
| Squamata            | 209.5                  | 168.9                  | (Benton et al. 2015; Ksepka et al. 2015) |
| Reptilia            | 295.9                  | 255.9                  | (Benton et al. 2015; Ksepka et al. 2015) |
| Amniota             | 332.9                  | 318                    | (Benton et al. 2015; Ksepka et al. 2015) |

## References

- Benton MJ, Donoghue PCJ, Vinther J, Asher RJ, Friedman M, Near TJ. 2015. Constraints on the timescale of animal evolutionary history. *Palaeontol. Electron.*
- Ksepka DT, Parham JF, Allman JF, Benton MJ, Carrano MT, Cranston KA, Donoghue PCJ, Head JJ, Hermsen EJ, Irmis RB, et al. 2015. The Fossil Calibration Database-A New Resource for Divergence Dating. *Syst. Biol.* 64:853–859.

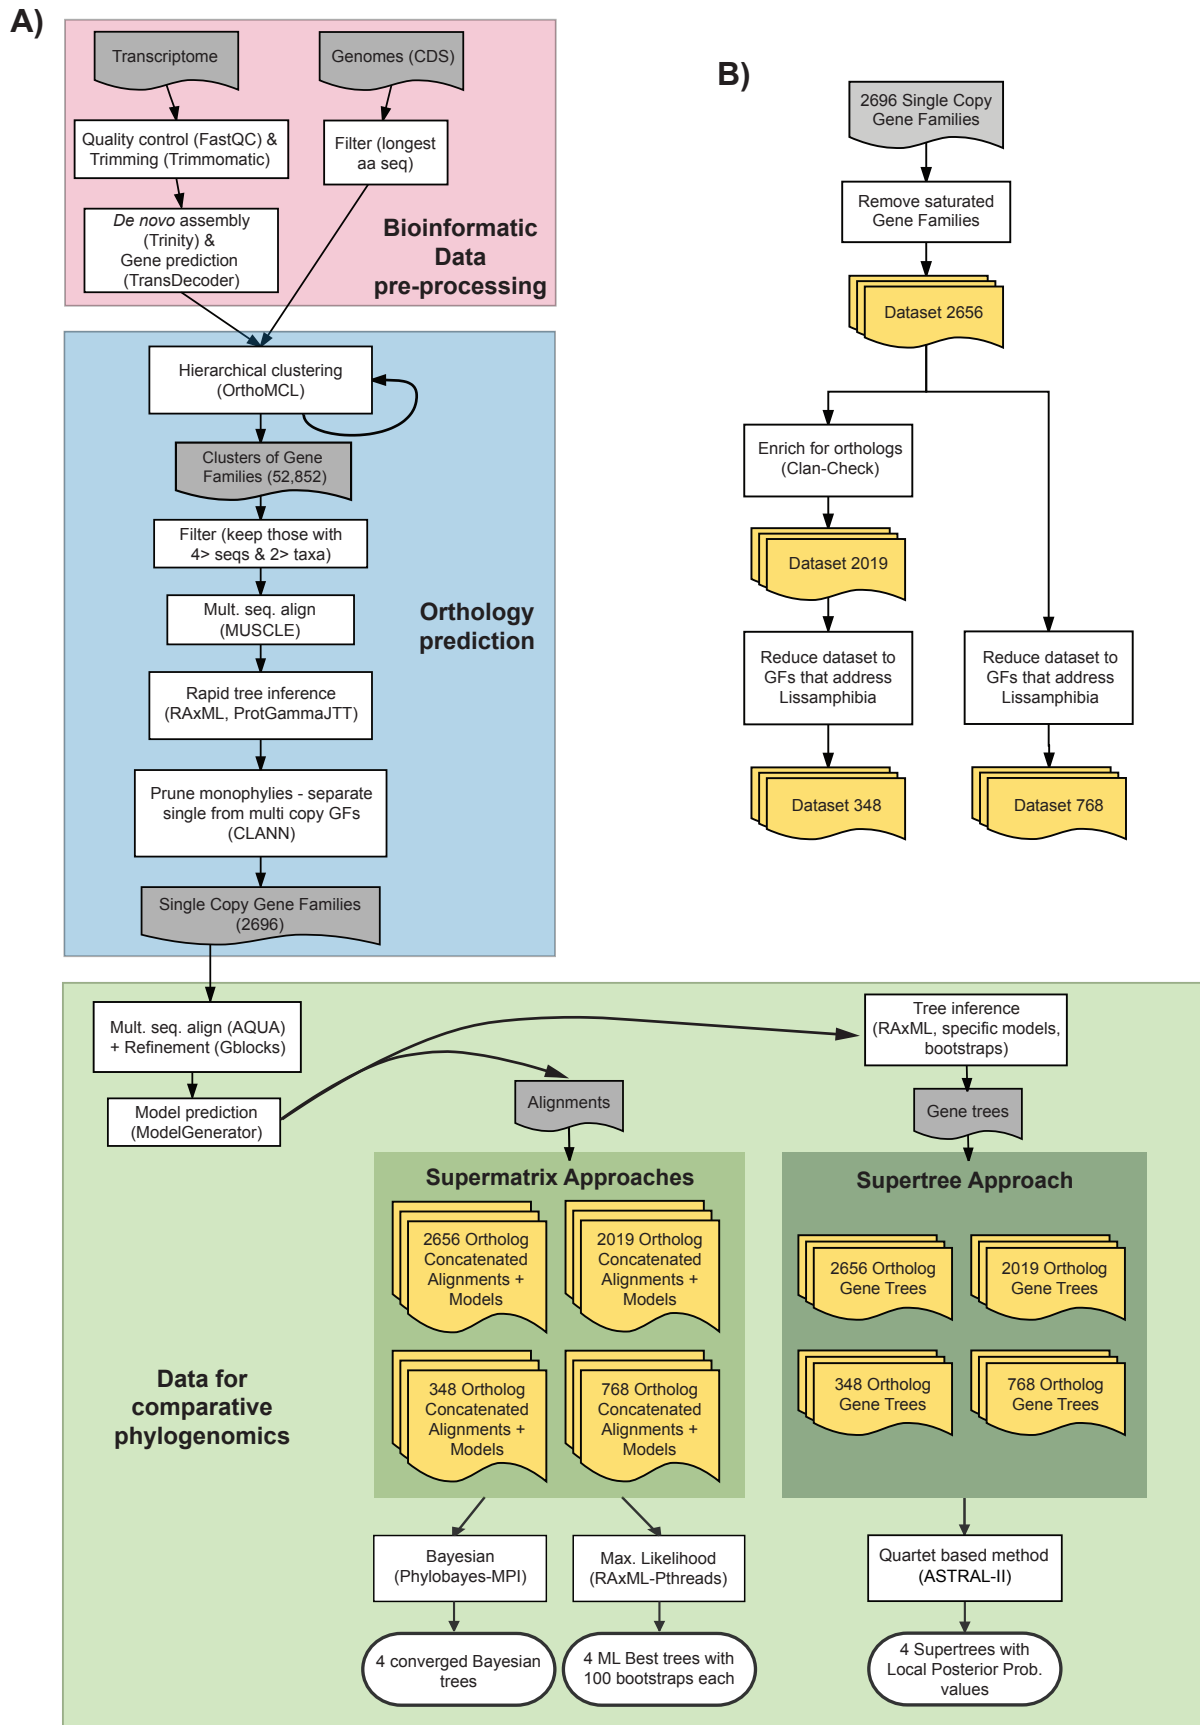

**Supplementary Fig. S21.** Schematic summary of data preparation for the phylogenomic study.

A) Pipeline of bioinformatic processing carried out to infer orthologous gene families for the phylogenomic analyses for this study. B) Rationale of filters applied to produce Dataset 2656, Dataset 2019 and Dataset 348 analysed in this study, and an additional Dataset 768, set out to test the effect of no ortholog enrichment.
